# Supplementary material for: An environmentally friendly Mukaiyama aldol reaction catalyzed by a strong Brønsted acid in solvent-free conditions
Source: Royal Society of Chemistry journal article supplement (doi:10.1039/c0ob00837k), 2011-01-01

## Electronic Supplementary Information for

# An Environmentally Friendly Mukaiyama Aldol Reaction Catalyzed by a Strong Brønsted Acid in Solvent-Free Conditions

Margherita Barbero,\* Stefano Bazzi, Silvano Cadamuro, Stefano Dughera, Claudio Magistris, Alessandra Smarra, and Paolo Venturello

Dipartimento di Chimica Generale e Chimica Organica, Università di Torino,  
Via P. Giuria 7, 10125 Torino, Italy

[margherita.barbero@unito.it](mailto:margherita.barbero@unito.it)

Fax: +39-011-6707642; Tel: +39-011-6707645

### Table of contents:

|                                                                                   |         |
|-----------------------------------------------------------------------------------|---------|
| General procedure for the for Mukaiyama aldol and Mukaiyama aldol-type reactions. | P 1–9   |
| Characterization of products.                                                     | P 9     |
| Mechanistic studies.                                                              | P 10–33 |
| Copies of $^1\text{H}$ and $^{13}\text{C}$ NMR spectra of aldol products.         |         |

### General Information

All the reactions were conducted in vials using analytical grade reagents, and were monitored by TLC, GC and GC-MS spectrometry. GC-MS spectra were recorded with an AT5973N mass selective detector connected to an AT6890N GC cross-linked methyl silicone capillary column. IR spectra were recorded using a Perkin Elmer Spectrum BX FT-IR spectrometer in neat conditions or as solutions in  $\text{CHCl}_3$ .  $^1\text{H}$  NMR and  $^{13}\text{C}$  NMR spectra were recorded in  $\text{CDCl}_3$  with a Bruker Avance 200 spectrometer at 200 MHz and 50 MHz, respectively; chemical shifts are given in ppm relative to  $\text{CDCl}_3$ . TLC were performed on Fluka silica gel TLCPET foils GF 254, 2–25  $\mu\text{m}$ , layer thickness 0.2 mm, medium pore diameter 60 Å. Plates were visualized using UV light (254 nm) or treatment with an appropriate revelatory agent (*p*-anisaldehyde), followed by heating. Column flash chromatography was carried out on  $\text{SiO}_2$  (particle size 0.032–0.063 mm/230–400 mesh). Petroleum ether refers to the fraction boiling in the range 40–60 °C and is abbreviated as PE. Commercially available reagents and solvents were purchased from Aldrich and were used without purification or distillation prior to use; Dowex 50X8 ion-exchange resin was purchased from Fluka. *o*-Benzenedisulfonimide (**1**) was prepared as described in literature.<sup>1</sup> Moisture-sensitive **3** was prepared following literature;<sup>2</sup> flasks and all equipment used for its generation were dried by electric heat gun under Ar; THF was distilled from Na/benzophenone ketyl. Acetal **13b** was prepared following a previously optimized procedure.<sup>3</sup> Details for the reactions and yields for the pure (GC, GC-MS, TLC,  $^1\text{H}$  NMR) isolated products are listed in Table 2, 3 and 4. Structure and purity of all the products were confirmed by comparison of their physical and spectral data (IR, MS,  $^1\text{H}$  NMR and  $^{13}\text{C}$  NMR) with those reported in literature.

<sup>1</sup> M. Barbero, M. Crisma, I. Degani, R. Fochi and P. Perracino, *Synthesis*, 1998, 1171.

<sup>2</sup> C. Wiles, P. Watts, S. J. Haswell and E. Pombo-Villar, *Tetrahedron*, 2005, **61**, 10757.

<sup>3</sup> M. Barbero, S. Cadamuro, S. Dughera and P. Venturello, *Synthesis*, 2008, 1379.

## General Procedures

### General procedure for Mukaiyama aldol reaction:

A mixture of aldehyde **4** (2.0 mmol), trimethylsilyl enol ether **2** (0.68 g, 4.0 mmol) or **3** (0.50 g, 2.6 mmol), and *o*-benzenedisulfonimide (**1**, mol % as in Table 2) was stirred at r.t. in a vial until TLC and GC analyses showed almost complete conversion of **4**. The reaction mixture was then treated with 2 N HCl (2 mL) and vigorously stirred at rt for 5-20 min. After TLC analyses showed complete hydrolysis of **5** to **6** (or **8** to **9**), the mixture was extracted with CH<sub>2</sub>Cl<sub>2</sub> (3x 10 mL). The organic extracts were washed with aqueous NaHCO<sub>3</sub> (20 mL), dried with Na<sub>2</sub>SO<sub>4</sub> and concentrated under reduced pressure. The crude residue was purified by flash chromatography on a short column of silica gel (eluent is reported in footnote of Table 2). Starting from **2**, aldols **6** were revealed by treatment of the TLC plates with an appropriate revelatory agent (*p*-anisaldehyde), followed by heating. The first eluted product was the enone **7**, followed by the aldol product **6-syn** and then by the *anti*- diastereomer.

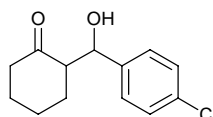

### 2-[(4-Chlorophenyl)(hydroxy)methyl]cyclohexan-1-one (**6a**).<sup>4</sup>

White solid, 68% yield; dr (*syn/anti*) = 50:50, determined by <sup>1</sup>H NMR analysis of title compound isolated partially as the pure *syn* and *anti* diastereomers, and partially as a mixture.

*syn*-**6a**:<sup>4</sup> <sup>1</sup>H NMR (200 MHz, CDCl<sub>3</sub>): δ = 1.13–1.25 (m, 1H), 1.40–1.88 (m, 5H), 1.98–2.10 (m, 1H), 2.30–2.50 (m, 3H), 5.29 (d, *J* = 2.4 Hz, 1H), 7.12–7.28 (m, 4H); <sup>13</sup>C NMR (50 MHz, CDCl<sub>3</sub>): δ = 24.7, 25.8, 27.7, 42.5, 56.8, 69.9, 127.0 (2C), 128.1 (2C), 132.1, 139.8, 214.4.

FT-IR (CHCl<sub>3</sub>, cm<sup>-1</sup>): 3584, 3539, 3016, 2946, 2870, 1698, 1494, 1208, 1091, 702.

*anti*-**6a**:<sup>4</sup> <sup>1</sup>H NMR (200 MHz, CDCl<sub>3</sub>): δ = 1.11–1.40 (m, 1H), 1.42–1.80 (m, 5H), 1.98–2.10 (m, 1H), 2.15–2.55 (m, 3H), 4.70 (d, *J* = 8.8 Hz, 1H), 7.14–7.29 (m, 4H). <sup>13</sup>C NMR (50 MHz, CDCl<sub>3</sub>): δ = 24.5, 27.5, 30.5, 42.4, 57.1, 73.8, 128.2 (2C), 128.3 (2C), 133.3, 139.4, 215.1.

FT-IR (CHCl<sub>3</sub>, cm<sup>-1</sup>): 3584, 3539, 3025, 2946, 2869, 1697, 1491, 1211, 1089, 781.

**2-(4-Chlorobenzylidene)cyclohexan-1-one (**7a**)**.<sup>5</sup> Yield 5%. <sup>1</sup>H NMR (200 MHz, CDCl<sub>3</sub>): δ = 1.64–1.74 (m, 2H), 1.78–1.90 (m, 2H), 2.45 (t, *J* = 6.8 Hz, 2H), 2.71 (td, *J* = 6.4 and 2.2 Hz, 2H), 7.20–7.30 (m, 4H), 7.34 (t, *J* = 2.2 Hz, 1H).

MS *m/z* (%): 220 [M<sup>+</sup>](88), 129 (100).

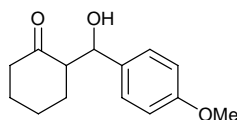

### 2-[(Hydroxy)(4-methoxyphenyl) methyl]cyclohexan-1-one (**6b**).

Solid, 68% yield; dr (*syn/anti*) = 59:41, determined by <sup>1</sup>H NMR analysis of title compound isolated partially as pure *syn* and *anti* diastereomers, and partially in mixture.

*syn*-**6b**:<sup>4</sup> <sup>1</sup>H NMR (200 MHz, CDCl<sub>3</sub>): δ = 1.40–1.80 (m, 5H), 1.95–2.10 (m, 1H), 2.20–2.55 (m, 3H), 2.96 (br s, 1H), 3.74 (s, 3H), 5.26 (br s, 1H), 6.81 (d, *J* = 8.8 Hz, 2H), 7.16 (d, *J* = 8.8 Hz, 2H); <sup>13</sup>C NMR (50 MHz, CDCl<sub>3</sub>): δ = 24.7, 26.0, 27.8, 42.5, 55.1, 57.1, 70.2, 113.4 (2C), 126.7 (2C), 133.4, 158.4, 214.7.

<sup>4</sup> Z.-H. Tzeng, H.-Y. Chen, R. J. Reddy, C.-T. Huang and K. Chen, *Tetrahedron* 2009, **65**, 2879

<sup>5</sup> U. P. Kreher, A. E. Rosamilia, C. L. Raston, J. L. Scott and C. R. Strauss, *Org. Lett.*, 2003, **5**, 3107

FT-IR (CHCl<sub>3</sub>, cm<sup>-1</sup>): 3584, 3555, 3027, 2945, 2870, 1697, 1614, 1514, 1250, 768, 668.

*anti*-**6b**: <sup>1</sup>H NMR (200 MHz, CDCl<sub>3</sub>): δ = 1.15–1.25 and 1.42–1.75 (m, 5H), 1.95–2.08 (m, 1H), 2.25–2.60 (m, 4H), 3.74 (s, 3H), 4.68 (d, *J* = 8.8 Hz, 1H), 6.82 (d, *J* = 8.8 Hz, 2H), 7.18 (d, *J* = 8.8 Hz, 2H); <sup>13</sup>C NMR (50 MHz, CDCl<sub>3</sub>): δ = 24.5, 27.6, 30.6, 42.5, 55.1, 57.3, 74.1, 113.6 (2C), 128.0 (2C), 133.0, 159.1, 215.4.

FT-IR (CHCl<sub>3</sub>, cm<sup>-1</sup>): 3584, 3540, 3016, 2930, 2857, 1700, 1604, 1512, 1203, 680, 664.

**2-(4-Methoxybenzylidene)cyclohexan-1-one (7b)**.<sup>5</sup> Yield 16%. <sup>1</sup>H NMR (200 MHz, CDCl<sub>3</sub>): δ = 1.66–1.84 (m, 4H), 2.41–2.44 (m, 2H), 2.72–2.75 (m, 2H), 3.75 (s, 3H), 6.84 (d, *J* = 8.8 Hz, 2H), 7.32 (d, *J* = 8.8 Hz, 2H), 7.35–7.45 (m, 1H).

MS *m/z* (%): 216 [M<sup>+</sup>](100).

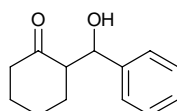

**2-[(Hydroxy)(phenyl)methyl]cyclohexan-1-one (6c).**

Solid, 51% yield; dr (*syn/anti*) = 57:43, determined by <sup>1</sup>H NMR analysis of title compound isolated partially as pure *syn* and *anti* diastereomers, and partially in mixture.

*syn*-**6c**: <sup>1</sup>H NMR (200 MHz, CDCl<sub>3</sub>): δ = 1.64–1.85 (m, 5H), 1.95–2.10 (m, 1H), 2.25–2.58 (m, 4H), 5.33 (d, *J* = 2.4 Hz, 1H), 7.18–7.34 (m, 5H); <sup>13</sup>C NMR (50 MHz, CDCl<sub>3</sub>): δ = 24.7, 25.8, 27.8, 42.5, 57.0, 70.4, 125.6 (2C), 126.8, 128.0 (2C), 141.3, 214.7.

FT-IR (CHCl<sub>3</sub>, cm<sup>-1</sup>): 3684, 3584, 3027, 2946, 2870, 1698, 1605, 1522, 1451, 1208, 787, 664.

*anti*-**6c**: <sup>1</sup>H NMR in mixture with *syn*-**6c** in 2:1 dr *syn:anti* (200 MHz, CDCl<sub>3</sub>) δ = 1.40–1.83 (m, 5H), 1.98–2.10 (m, 1H), 2.23–2.62 (m, 3H), 4.73 (*anti*; d, *J* = 8.8 Hz, 1H), 5.33 (*syn*; br s, 1H), 7.18–7.34 (m, 5H).

FT-IR (CHCl<sub>3</sub>, cm<sup>-1</sup>): 3685, 3622, 3026, 2977, 2896, 1698, 1522, 1424, 1210, 792, 680.

**2-Benzylidenecyclohexan-1-one (7c)**.<sup>5</sup> Yield 19%. <sup>1</sup>H NMR (200 MHz, CDCl<sub>3</sub>): δ = 1.67–1.75 (m, 2H), 1.84–1.90 (m, 2H), 2.48 (t, *J* = 6.6 Hz, 2H), 2.78 (td, *J* = 6.4 and 2.2 Hz, 2H), 7.25–7.35 (m, 5H), 7.44 (t, *J* = 2.2 Hz, 1H).

MS *m/z* (%): 186 [M<sup>+</sup>](63), 185 (100).

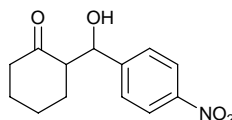

**2-[(Hydroxy)(4-nitrophenyl)methyl]cyclohexan-1-one (6d).**

Yellow solid, 48% yield; dr (*syn/anti*) = 50:50, determined by <sup>1</sup>H NMR analysis of title compound isolated partially as pure *syn* and *anti* diastereomers, and partially in mixture.

*syn*-**6d**: <sup>1</sup>H NMR (200 MHz, CDCl<sub>3</sub>): δ = 1.35–1.70 (m, 5H), 1.95–2.10 (m, 1H), 2.23–2.61 (m, 3H), 3.19 (d, *J* = 3.2 Hz, 1H), 5.41 (d, *J* = 2.0 Hz, 1H), 7.42 (d, *J* = 9.0 Hz, 2H), 8.12 (d, *J* = 9.0 Hz, 2H); <sup>13</sup>C NMR (50 MHz, CDCl<sub>3</sub>): δ = 24.5, 25.7, 27.6, 42.4, 56.6, 69.9, 123.2 (2C), 126.4 (2C), 146.8, 149.0, 213.9.

FT-IR (CHCl<sub>3</sub>, cm<sup>-1</sup>): 3584, 3545, 3027, 2947, 2871, 1700, 1605, 1522, 1324, 1208, 854.

*anti*-**6d**: <sup>1</sup>H NMR in mixture with *syn*-**6d** in 1:1 dr *syn:anti* (200 MHz, CDCl<sub>3</sub>) δ = 1.15–1.83 (m, 6H), 1.95–2.10 (m, 1H), 2.15–2.40 (m, 2H), 2.40–2.60 (m, 1H), 4.83 (*anti*; d, *J* = 8.4 Hz, 1H), 5.41 (*syn*; br s, 1H), 7.35–7.50 (m, 2H), 8.07–8.20 (m, 2H).

FT-IR (CHCl<sub>3</sub>, cm<sup>-1</sup>): 3584, 3545, 3029, 2947, 2870, 1699, 1607, 1525, 1350, 1214, 856.

**2-(4-Nitrobenzylidene)cyclohexan-1-one (7d).**<sup>6</sup> Yield 15%. <sup>1</sup>H NMR (200 MHz, CDCl<sub>3</sub>):  $\delta$  = 1.60–2.00 (m, 4H), 2.51 (t,  $J$  = 6.6 Hz, 2H), 2.76 (td,  $J$  = 6.4 and 2.2 Hz, 2H), 7.35–7.39 (m, 1H), 7.45 (d,  $J$  = 8.8 Hz, 2H), 8.17 (d,  $J$  = 8.8 Hz, 2H). MS  $m/z$  (%): 231 [ $M^+$ ](13), 214 (100).

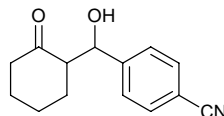

**2-[(4-Cyanophenyl)(hydroxy)methyl]cyclohexan-1-one (6e).**

Solid, yield 48%; dr (*syn/anti*) = 46:54, determined by <sup>1</sup>H NMR analysis of title compound isolated partially as pure *syn* and *anti* diastereomers, and partially in mixture.

*syn*-**6e**:<sup>4</sup> <sup>1</sup>H NMR (200 MHz, CDCl<sub>3</sub>):  $\delta$  = 1.38–1.80 (m, 5H), 1.95–2.10 (m, 1H), 2.20–2.40 (m, 2H), 2.45–2.58 (m, 1H), 3.21 (br s, 1H), 5.33 (d,  $J$  = 2.0 Hz, 1H), 7.34 (d,  $J$  = 9.6 Hz, 2H), 7.53 (d,  $J$  = 9.6 Hz, 2H); <sup>13</sup>C NMR (50 MHz, CDCl<sub>3</sub>):  $\delta$  = 24.6, 25.7, 27.6, 42.4, 56.6, 70.0, 109.8, 126.3 (2C), 130.4, 132.0 (2C), 146.9, 213.9.

FT-IR (CHCl<sub>3</sub>, cm<sup>-1</sup>): 3584, 3545, 3024, 2947, 2871, 2232, 1701, 1604.

*anti*-**6e**:<sup>4</sup> <sup>1</sup>H NMR in mixture with *syn*-**6d** in 0.8:1 dr *syn:anti* (200 MHz, CDCl<sub>3</sub>)  $\delta$  = 1.15–1.83 (m, 6H), 1.95–2.05 (m, 1H), 2.15–2.40 (m, 3H), 4.77 (*anti*; d,  $J$  = 8.4 Hz, 1H), 5.36 (*syn*; br s, 1H), 7.30–7.42 (m, 2H), 7.50–7.61 (m, 2H).

FT-IR (CHCl<sub>3</sub>, cm<sup>-1</sup>): 3584, 3545, 3020, 2931, 2857, 2232, 1682, 1604.

**2-(4-Cyanobenzylidene)cyclohexan-1-one (7e).**<sup>7</sup> Yield 14%. <sup>1</sup>H NMR (200 MHz, CDCl<sub>3</sub>):  $\delta$  = 1.69–1.80 (m, 2H), 1.83–1.95 (m, 2H), 2.50 (t,  $J$  = 6.8 Hz, 2H), 2.70–2.88 (m, 2H), 7.39 (d,  $J$  = 8.4 Hz, 2H), 7.48 (s, 1H), 7.60 (d,  $J$  = 8.2 Hz, 2H).

MS  $m/z$  (%): 211 [ $M^+$ ](100).

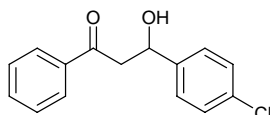

**3-(4-Chlorophenyl)-3-hydroxy-1-phenylpropan-1-one (9a).**<sup>8</sup>

White needles, mp 99.4–100.4 °C (CH<sub>2</sub>Cl<sub>2</sub>–PE) [lit.<sup>9</sup> 96–96.5 °C]. Yield 87%.

<sup>1</sup>H NMR (200 MHz, CDCl<sub>3</sub>):  $\delta$  = 3.20 (br s, 1H), 3.28 (d,  $J$  = 6.0 Hz, 2H), 5.20–5.31 (m, 1H), 7.26–7.32 (m, 4H), 7.35–7.45 (m, 2H), 7.48–7.55 (m, 1H), 7.80–7.93 (m, 2H). <sup>13</sup>C NMR (50 MHz, CDCl<sub>3</sub>):  $\delta$  = 47.1, 69.2, 127.0 (2C), 128.0 (2C), 128.5 (2C), 128.6 (2C), 133.1, 133.6, 136.2, 141.3, 199.8.

FT-IR (CHCl<sub>3</sub>, cm<sup>-1</sup>): 3584, 3550, 3010, 2905, 1677, 1598, 1582, 1494, 1450, 1093, 1014, 800, 668.

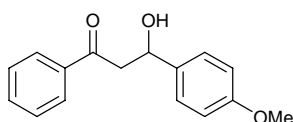

<sup>6</sup> U. Das, A. Doroudi, S. Das, B. Bandy, J. Balzarini, E. De Clercq and J. R. Dimmock, *Bioorg. Med. Chem.*, 2008, **16**, 6261.

<sup>7</sup> E. D. Beaulieu, L. Voss and D. Trauner, *Org. Lett.*, 2008, **10**, 869.

<sup>8</sup> C. H. Cheon and H. Yamamoto, *Tetrahedron*, 2010, **66**, 4257.

<sup>9</sup> E. Hasegawa, K. Ishiyama, T. Horaguchi and T. Shimizu, *J. Org. Chem.*, 1991, **56**, 1631.

**3-Hydroxy-3-(4-methoxyphenyl)-1-phenylpropan-1-one (9b).**<sup>8,10</sup>

Colorless oil; yield 88%.

<sup>1</sup>H NMR (200 MHz, CDCl<sub>3</sub>):  $\delta$  = 3.24–3.32 (m, 2H), 3.50 (br s, 1H), 3.72 (s, 3H), 5.22 (m, 1H), 6.80–6.90 (m, 2H), 7.25–7.60 (m, 5H), 7.84–7.92 (m, 2H); <sup>13</sup>C NMR (50 MHz, CDCl<sub>3</sub>):  $\delta$  = 47.2, 55.1, 69.5, 113.7 (2C), 126.9 (2C), 128.0 (2C), 128.5 (2C), 133.4, 135.1, 136.5, 158.9, 199.9.

FT-IR (neat, cm<sup>-1</sup>): 3480, 3062, 3003, 2907, 2837, 1682, 1513, 1449, 1249, 1034, 833, 724, 691.

MS *m/z* (%): 252 [M<sup>+</sup>] (5), 238 [M<sup>+</sup>–18] (100).

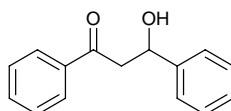

**3-Hydroxy-1,3-diphenylpropan-1-one (9c).**<sup>8,10</sup>

Viscous colorless oil; yield 80%.

<sup>1</sup>H NMR (200 MHz, CDCl<sub>3</sub>):  $\delta$  = 2.46 (br s, 1H), 3.32 (d, *J* = 6.2 Hz, 2H), 5.30 (m, 1H), 7.20–7.45 (m, 7H), 7.50–7.56 (m, 1H), 7.80–7.95 (m, 2H); <sup>13</sup>C NMR (50 MHz, CDCl<sub>3</sub>):  $\delta$  = 47.3, 69.9, 125.6, 127.5, 128.0, 128.4, 128.5, 133.5, 136.4, 142.8, 200.0.

FT-IR (CDCl<sub>3</sub>, cm<sup>-1</sup>): 3584, 3545, 3035, 3011, 2905, 1677, 1599, 1582, 1496, 1450, 778, 691, 668.

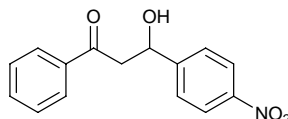

**3-Hydroxy-3-(4-nitrophenyl)-1-phenylpropan-1-one (9d).**<sup>8,10</sup>

White needles, mp 114.0–114.7 °C (CH<sub>2</sub>Cl<sub>2</sub>–PE) [lit.<sup>10</sup> 113–114 °C]. Yield 91%.

<sup>1</sup>H NMR (200 MHz, CDCl<sub>3</sub>):  $\delta$  = 3.26–3.36 (m, 2H), 3.82 (br s, 1H), 5.35–5.44 (m, 1H), 7.35–7.48 (m, 2H), 7.50–7.60 (m, 3H), 7.85–7.92 (m, 2H), 8.14–8.20 (m, 2H); <sup>13</sup>C NMR (50 MHz, CDCl<sub>3</sub>):  $\delta$  = 46.8, 69.0, 123.6 (2C), 126.4 (2C), 128.0 (2C), 128.7 (2C), 133.9, 135.9, 147.1, 150.0, 199.3.

FT-IR (CDCl<sub>3</sub>, cm<sup>-1</sup>): 3584, 3550, 2907, 3024, 1677, 1600, 1582, 1524, 1450, 1350, 1208, 736, 670.

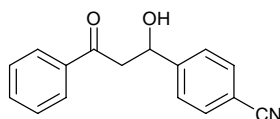

**3-(4-Cyanophenyl)-3-hydroxy-1-phenylpropan-1-one (9e).**<sup>11</sup>

White needles, mp 86.0–87.0 °C (CH<sub>2</sub>Cl<sub>2</sub>–PE). Yield 96%.

<sup>1</sup>H NMR (200 MHz, CDCl<sub>3</sub>):  $\delta$  = 3.20–3.32 (m, 2H), 3.75 (br s, 1H), 5.25–5.38 (m, 1H), 7.30–7.60 (m, 7H), 7.80–7.90 (m, 2H); <sup>13</sup>C NMR (50 MHz, CDCl<sub>3</sub>):  $\delta$  = 46.9, 69.1, 111.1, 118.6, 126.3 (2C), 128.0 (2C), 128.6 (2C), 132.5 (2C), 133.8, 136.0, 148.3, 199.3.

FT-IR (CDCl<sub>3</sub>, cm<sup>-1</sup>): 3584, 3550, 3030, 2906, 2233, 1678, 1598, 1581, 1450, 1231, 1210, 798, 727.

<sup>10</sup> C. W. Downey and M. W. Johnson, *Tetrahedron Lett.*, 2007, **48**, 3559.

<sup>11</sup> H. Terao, Y. Ono, Y. Ito, M. Isogai, T. Hamada, Y. Imanishi and A. Tsumoda, JP03188425 A19910816; *Chem Abstr.* 1991, **116**, 162143.

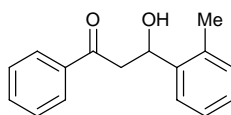

**3-Hydroxy-1-phenyl-3-(2-tolyl)propan-1-one (9f).<sup>8</sup>**

Colorless oil; yield 98%.

<sup>1</sup>H NMR (200 MHz, CDCl<sub>3</sub>):  $\delta$  = 2.31 (s, 3H), 3.24–3.30 (m, 2H), 3.57 (br s, 1H), 5.50–5.58 (m, 1H), 7.12–7.24 (m, 3H), 7.35–7.60 (m, 4H), 7.88–7.98 (m, 2H); <sup>13</sup>C NMR (50 MHz, CDCl<sub>3</sub>):  $\delta$  = 19.0, 46.0, 66.3, 125.4, 126.3, 127.3, 128.0 (2C), 128.6 (2C), 130.3, 133.5, 133.9, 136.4, 140.9, 200.1

FT-IR (neat, cm<sup>-1</sup>): 3469, 3063, 2923, 1682, 1598, 1580, 1490, 1450, 1212, 1065, 760, 691.

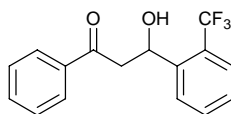

**3-Hydroxy-1-phenyl-3-(2-trifluoromethylphenyl)propan-1-one (9g).**

Colorless oil; yield 80%.

<sup>1</sup>H NMR (200 MHz, CDCl<sub>3</sub>):  $\delta$  = 3.10–3.40 (m, 2H), 2.89 (br s, 1H), 5.70–5.78 (m, 1H), 7.30–7.65 (m, 6H), 7.84–7.95 (m, 3H); <sup>13</sup>C NMR (50 MHz, CDCl<sub>3</sub>):  $\delta$  = 47.3, 65.4, 125.3 (q,  $J$  = 6.6 Hz), 126.2 (q,  $J$  = 30.0 Hz), 127.5, 127.7, 128.0 (2C), 128.5 (2C), 129.5 (q,  $J$  = 265 Hz), 132.3, 133.6, 136.1, 141.8, 199.5.

FT-MS  $m/z$  (%): 294 [M<sup>+</sup>] (5), 276 [M<sup>+</sup>–18] (20), 105 (100).

IR (neat, cm<sup>-1</sup>): 3480, 3069, 2915, 1682, 1598, 1582, 1493, 1451, 1308, 1166, 1060, 1037, 771.

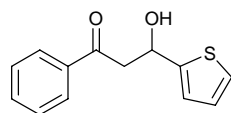

**3-Hydroxy-1-phenyl-3-(2-thienyl)propan-1-one (9h).<sup>8,10</sup>**

Viscous oil, yield 89%.

<sup>1</sup>H NMR (200 MHz, CDCl<sub>3</sub>):  $\delta$  = 3.35–3.46 (m, 2H), 3.93–3.99 (m, 1H), 5.45–5.55 (m, 1H), 6.88–6.98 (m, 2H), 7.15–7.20 (m, 1H), 7.35–7.55 (m, 3H), 7.83–7.91 (m, 2H); <sup>13</sup>C NMR (50 MHz, CDCl<sub>3</sub>):  $\delta$  = 47.1, 66.2, 123.5, 124.5, 126.6, 128.1, 128.6, 133.6, 136.3, 146.8, 199.3.

FT-IR (neat, cm<sup>-1</sup>): 3468, 3067, 2904, 1678, 1597, 1580, 1449, 1212, 1040, 759, 693.

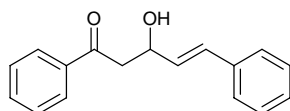

**(E)-3-Hydroxy-1,5-diphenylpent-4-en-1-one (9i).<sup>8,10</sup>**

White solid, mp 53.2–54.1 °C (CH<sub>2</sub>Cl<sub>2</sub>/PE) [lit.<sup>12</sup> 52.1–52.9 °C]; yield 80%.

<sup>1</sup>H NMR (200 MHz, CDCl<sub>3</sub>):  $\delta$  = 3.23 (d,  $J$  = 6.0 Hz, 2H), 3.49 (br s, 1H), 4.85–4.93 (m, 1H), 6.27 (dd,  $J$  = 15.8 and 6 Hz, 1H), 6.66 (d,  $J$  = 16.0 Hz, 1H), 7.20–7.55 (m, 8H), 7.90–7.95 (m, 2H); <sup>13</sup>C

<sup>12</sup> L. Tao, C. Lin, H. Taiping, *Pestic. Biochem. Physiol.*, 2007, **89**, 60.

NMR (50 MHz, CDCl<sub>3</sub>):  $\delta$  = 45.1, 68.5, 126.4, 127.5, 128.0, 128.4, 128.5, 130.2, 130.3, 133.5, 136.4, 136.5, 199.8.

FT-IR (CHCl<sub>3</sub>, cm<sup>-1</sup>): 3584, 3545, 3011, 2904, 1678, 1599, 1585, 1450, 1215, 704.

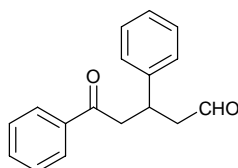

### 5-Oxo-3,5-diphenylpentanal (10).<sup>13,14</sup>

Colorless oil; yield 16%.

<sup>1</sup>H NMR (200 MHz, CDCl<sub>3</sub>):  $\delta$  = 2.77–2.84 (m, 2H), 3.27–3.32 (m, 2H), 3.84–3.98 (m, 1H), 7.20–7.50 (m, 8H), 7.82–7.90 (m, 2H), 9.65 (s, 1H); <sup>13</sup>C NMR (50 MHz, CDCl<sub>3</sub>):  $\delta$  = 35.2, 44.8, 49.4, 126.8, 127.2, 127.9, 128.5, 128.7, 133.1, 136.6, 143.0, 197.9, 201.0.

FT-IR (CHCl<sub>3</sub>, cm<sup>-1</sup>): 3584, 3535, 3035, 2965, 2940, 1722, 1678, 1599, 1582, 1450, 1273, 690.

MS *m/z* (%): 252 [M<sup>+</sup>] (5), 105 (100).

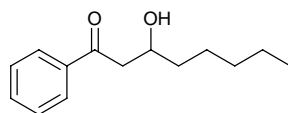

### 3-Hydroxy-1-phenyloctan-1-one (12).<sup>15</sup>

Viscous colorless oil; yield 32%.

<sup>1</sup>H NMR (200 MHz, CDCl<sub>3</sub>):  $\delta$  = 0.77–0.90 (m, 3H), 1.18–1.60 (m, 8H), 2.89–2.20 (m, two dd overlapped and one br s, 3H), 4.11–4.20 (m, 1H), 7.34–7.55 (m, 3H), 7.82–7.95 (m, 2H); <sup>13</sup>C NMR (50 MHz, CDCl<sub>3</sub>):  $\delta$  = 13.9, 22.5, 25.1, 31.6, 36.3, 44.8, 67.6, 127.9, 128.5, 133.3, 136.6, 200.9.

FT-IR (CHCl<sub>3</sub>, cm<sup>-1</sup>): 3584, 3545, 3009, 2905, 2861, 1677, 1599, 1582, 1450, 1234, 1214, 1181.

MS *m/z* (%): 220 [M<sup>+</sup>] (5), 206 [M<sup>+</sup>-18] (25), 105 (100).

### Synthesis of cyclohexanecarbaldehyde dimethyl acetal (13b):

Title compound was prepared following a previously optimized procedure.<sup>3</sup>

To a solution of cyclohexanecarbaldehyde (1.12 g, 10 mmol) in methanol (10 mL) was added *o*-benzenedisulfonimide (**1**; 0.5 mol%; 0.011 g, 0.05 mmol) and the reaction mixture was stirred at r.t. for 1h. The reaction mixture was treated with pentane and NaHCO<sub>3</sub>, extracted with pentane (3 x 10 mL) and evaporated under reduced pressure. The residue was virtually pure (GC, GC-MS, TLC, <sup>1</sup>H NMR and <sup>13</sup>C NMR) title compound in 99 % yield (1.56 g); colorless oil.<sup>16</sup> Traces of a trimer of cyclohexane carbaldehyde were detected; GC-MS: 335 ([M<sup>+</sup>-1] 5), 225 (70), 113 (85), 95 (100).

<sup>1</sup>H NMR (200 MHz, CDCl<sub>3</sub>):  $\delta$  = 1.48–1.72 (m, 6H), 0.80–1.20 (m, 5H), 3.25 (s, 6H), 3.91 (d, *J* = 7.2 Hz, 1H); <sup>13</sup>C NMR (50 MHz, CDCl<sub>3</sub>):  $\delta$  = 25.6, 26.2, 27.8, 39.8, 53.3, 108.3.

MS *m/z* (%): 157 [M<sup>+</sup>-1](5), 75 (100).

### General procedure for Mukaiyama aldol-type reaction:

<sup>13</sup> J. Bielowski, S. Brandänge, L. Lindblom and S. Ramanvongse, *Acta Chem. Scand., Ser. B*, 1979, **33**, 462.

<sup>14</sup> W. Wang, H. Li and J. Wang, *Org. Lett.*, 2005, **7**, 1637.

<sup>15</sup> T.-P. Loh and X.-R. Li, *Tetrahedron*, 1999, **55**, 10789.

<sup>16</sup> Y. Mei, P. A. Bentley and J. Du, *Tetrahedron Lett.*, 2009, **50**, 4199.

A mixture of aldehyde dimethyl acetal **13** (2.0 mmol), trimethylsilyl enol ether **3** (0.50 g, 2.6 mmol), and *o*-benzenedisulfonimide (**1**, mol % as in Table 3) was stirred at r.t. in a vial until TLC and GC analyses showed almost complete conversion of **13**. The mixture was extracted with CH<sub>2</sub>Cl<sub>2</sub>, washed with water and then extracted with CH<sub>2</sub>Cl<sub>2</sub> (3 x 10 mL). The organic extracts were dried with Na<sub>2</sub>SO<sub>4</sub> and concentrated under reduced pressure. The crude residue was purified by flash chromatography on a short column of silica gel (eluent reported in footnote of Table 3).

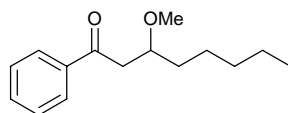

### 3-Methoxy-1-phenyloctan-1-one (**14a**).

Colorless oil; yield 81%.

<sup>1</sup>H NMR (200 MHz, CDCl<sub>3</sub>): δ = 0.70–0.85 (m, 3H), 1.20–1.05 (m, 6H), 1.45–1.60 (m, 2H), 2.86 (dd, *J* = 16.2 and 5.4 Hz, 1H), 2.86 (overlapped dd, *J* = 16.0 and 6.8 Hz, 1H), 3.26 (s, 3H), 3.75–3.85 (m, 1H), 7.35–7.50 (m, 3H), 7.85–7.93 (m, 2H); <sup>13</sup>C NMR (50 MHz, CDCl<sub>3</sub>): δ = 13.9, 22.4, 24.7, 31.7, 34.2, 43.1, 57.0, **77.7**, 128.0 (2C), 128.4 (2C), 132.8, 137.2, 198.9.

FT-IR (neat, cm<sup>-1</sup>): 3062, 2930, 2860, 1686, 1598, 1581, 1449, 1364, 1282, 1212, 1097, 753, 659.

MS *m/z* (%): 234 [M<sup>+</sup>] (2), 219 [M<sup>+</sup>-15] (10), 105 (100).

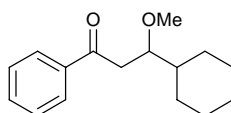

### 3-Cyclohexyl-3-methoxy-1-phenylpropan-1-one (**14b**).<sup>10</sup>

Colorless oil, 61% yield.

<sup>1</sup>H NMR (200 MHz, CDCl<sub>3</sub>): δ = 0.90–1.18 (m, 5H), 1.45–1.72 (m, 6H), 2.84 (dd, *J* = 16.2 and 4.0 Hz, 1H), 3.13 (overlapped dd, *J* = 16.2 and 7.8 Hz, 1H), 3.23 (s, 3H), 3.59–3.68 (m, 1H), 7.32–7.46 (m, 3H), 7.85–7.92 (m, 2H); <sup>13</sup>C NMR (50 MHz, CDCl<sub>3</sub>): δ = 26.1 (2C), 26.4, 28.3, 28.4, 40.6, 41.7, 58.1, 81.6, 128.0 (2C), 128.3 (2C), 132.7, 137.3, 199.2.

FT-IR (CHCl<sub>3</sub>, cm<sup>-1</sup>): 3013, 2905, 2856, 1684, 1598, 1582, 1450, 1232, 1095.

MS *m/z* (%): 246 [M<sup>+</sup>] (2), 231 [M<sup>+</sup>-15] (10), 105 (100).

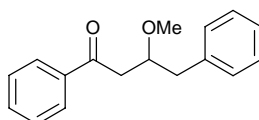

### 3-Methoxy-1,4-diphenylbutan-1-one (**14c**).<sup>17</sup>

Colorless viscous oil; yield 33%.

<sup>1</sup>H NMR (200 MHz, CDCl<sub>3</sub>): δ = 2.80–2.91 (m, 3H), 3.18 (dd, *J* = 16.4 and 7.2 Hz, 1H), 3.28 (s, 3H), 4.05–4.11 (m, 1H), 7.15–7.25 (m, 5H), 7.39–7.50 (m, 3H), 7.83 (d, *J* = 7.8 Hz, 2H); <sup>13</sup>C NMR (50 MHz, CDCl<sub>3</sub>): δ = 40.0, 42.6, 57.4, 78.4, 124.3, 128.0 (2C), 128.4 (2C), 128.7 (2C), 129.4 (2C), 132.9, 137.0, 138.0, 198.6.

FT-IR (neat, cm<sup>-1</sup>): 3063, 3029, 2932, 2830, 1683, 1599, 1582, 1496, 1450, 1360, 1266, 1121, 760, 691.

<sup>17</sup> J. Moorthy, S. Samanta, A. L. Koner, S. Saha and W. M. Nau, *J. Am. Chem. Soc.*, 2008, **130**, 13608.



MS  $m/z$  (%): 239 [ $M^+ - 15$ ] (2), 105 (100).

### Mechanistic studies:

#### A) Mukaiyama aldol reaction in the presence of a hindered base:<sup>18,19</sup>

A mixture of trimethylsilyl enol ether **3** (0.50 g, 2.6 mmol), 2,6-di(*t*-butyl)-4-methylpyridine (5 mol %, 0.0205 g) and *o*-benzenedisulfonimide (**1**, 2 mol %, 0.0088 g) was stirred at r.t. in a vial; after 5 min aldehyde **4f** (0.24 g; 2.0 mmol) was added. The reaction was suspended after 24 h. Acid hydrolysis and usual work-up followed by flash chromatography gave **9f** (0.40 g; 83%; entry 1 of Table 4).

#### B) Mukaiyama aldol reaction catalyzed by *in situ* formed Lewis catalyst:<sup>18,19</sup>

Reactions were carried out on 2 mmol of reactants, as usual.

A mixture of trimethylsilyl enol ether **2** or **3** (2 mol %) and one equivalent of **1** was stirred at r.t. in a vial: <sup>1</sup>H NMR spectra showed the formation of *N*-trimethylsilyl-*o*-benzenedisulfonimide and TLC analysis showed complete disappearance of the silyl enol ether. Then reactants **2** and **4b** (or **3** and **4f**) were added and the reactions were run as in the general procedure. Both reactions proceeded in a similar fashion. In both cases, hydrolysis of **2** (or **3**) was faster than the expected Mukaiyama reaction. The reactions reached completion in reduced times and yields with respect to the optimized procedures, as reported in entries 2 and 3 of Table 4.

<sup>18</sup> P. García-García, F. Lay, P. García-García, C. Rabalakos and B. List, *Angew. Chem. Int. Ed.*, 2009, **48**, 4363.

<sup>19</sup> C. H. Cheon and H. Yamamoto, *Tetrahedron Lett.*, 2009, **50**, 3555.

**(*syn*)-2-[(4-Chlorophenyl)(hydroxy)methyl]cyclohexan-1-one (6a).**

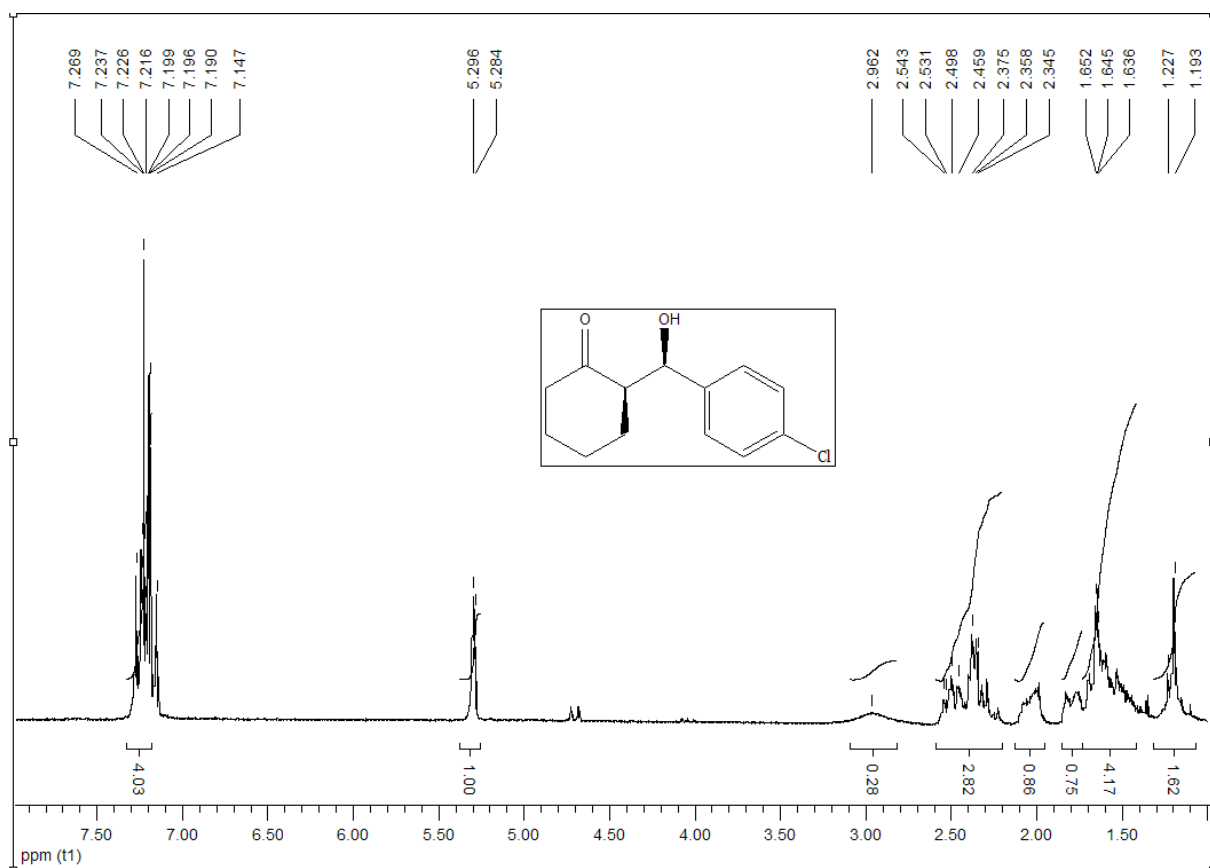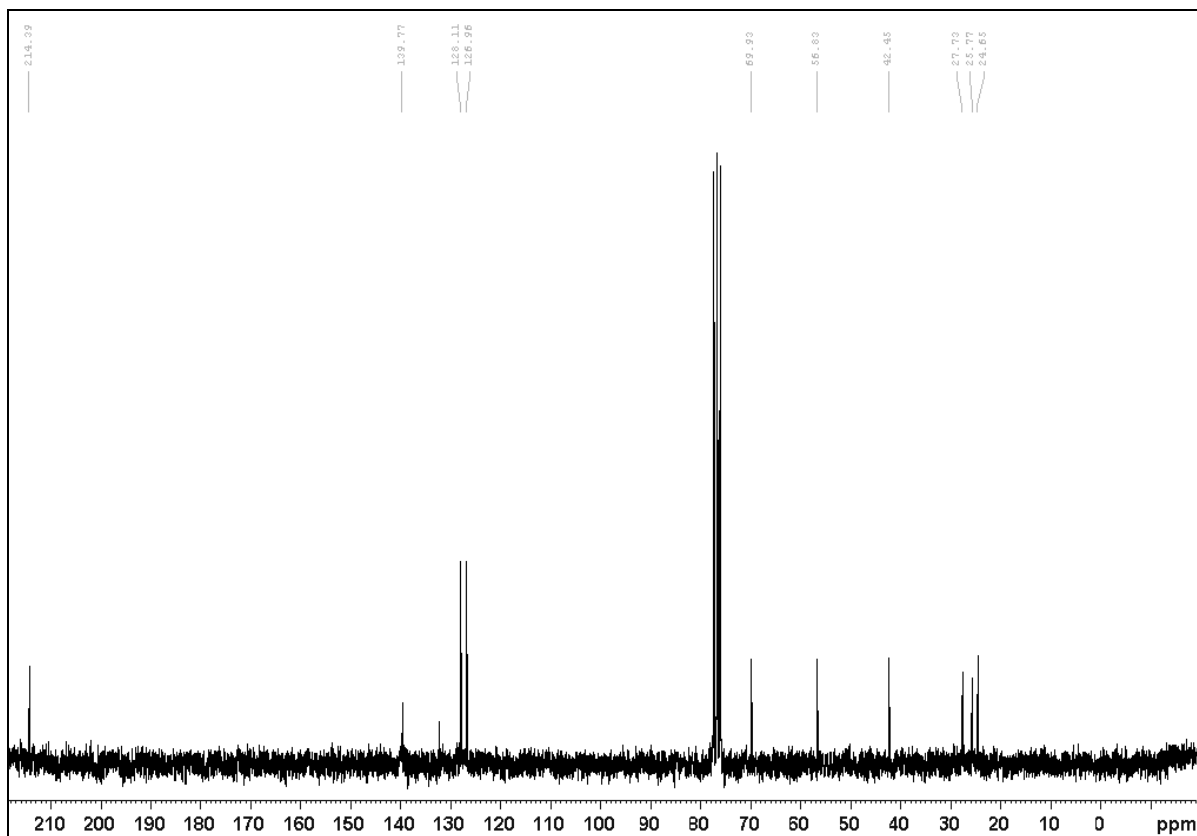

**(anti)-2-[(4-Chlorophenyl)(hydroxy)methyl]cyclohexan-1-one (6a).**

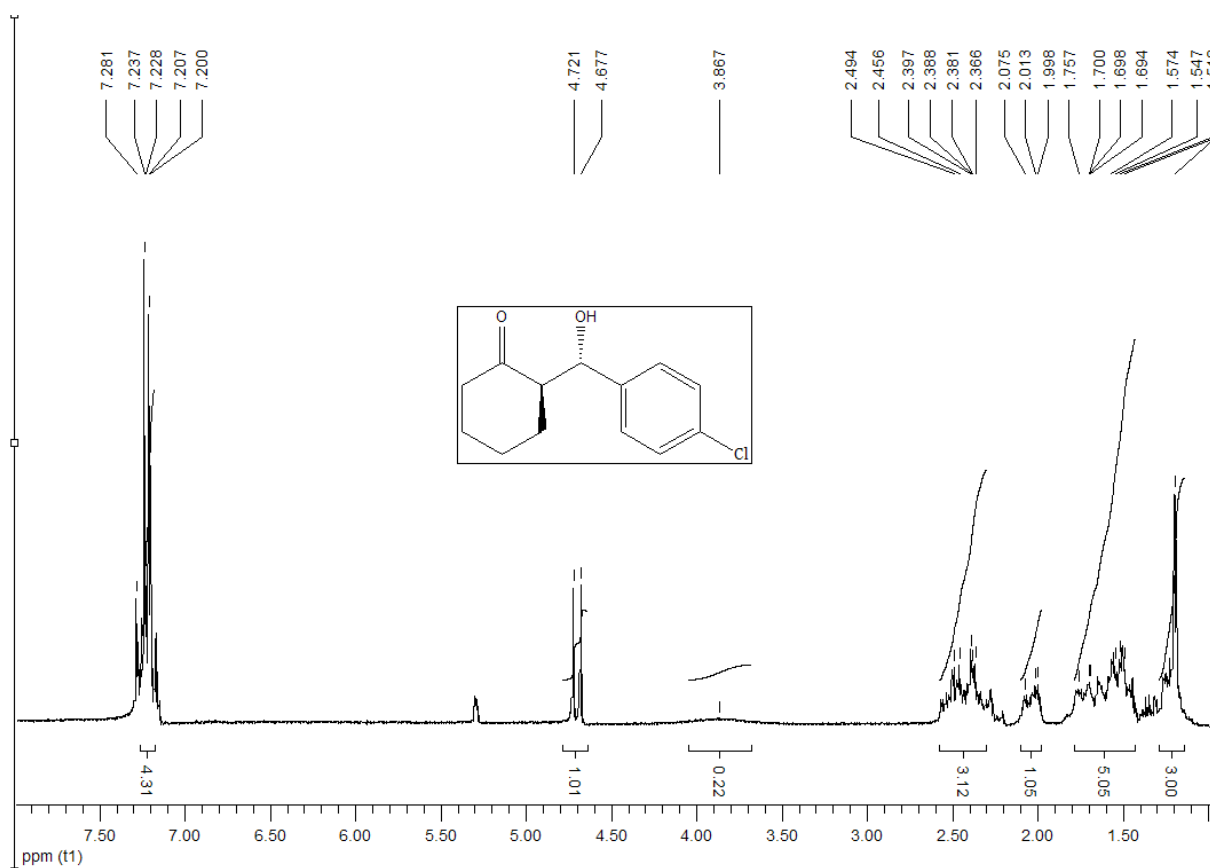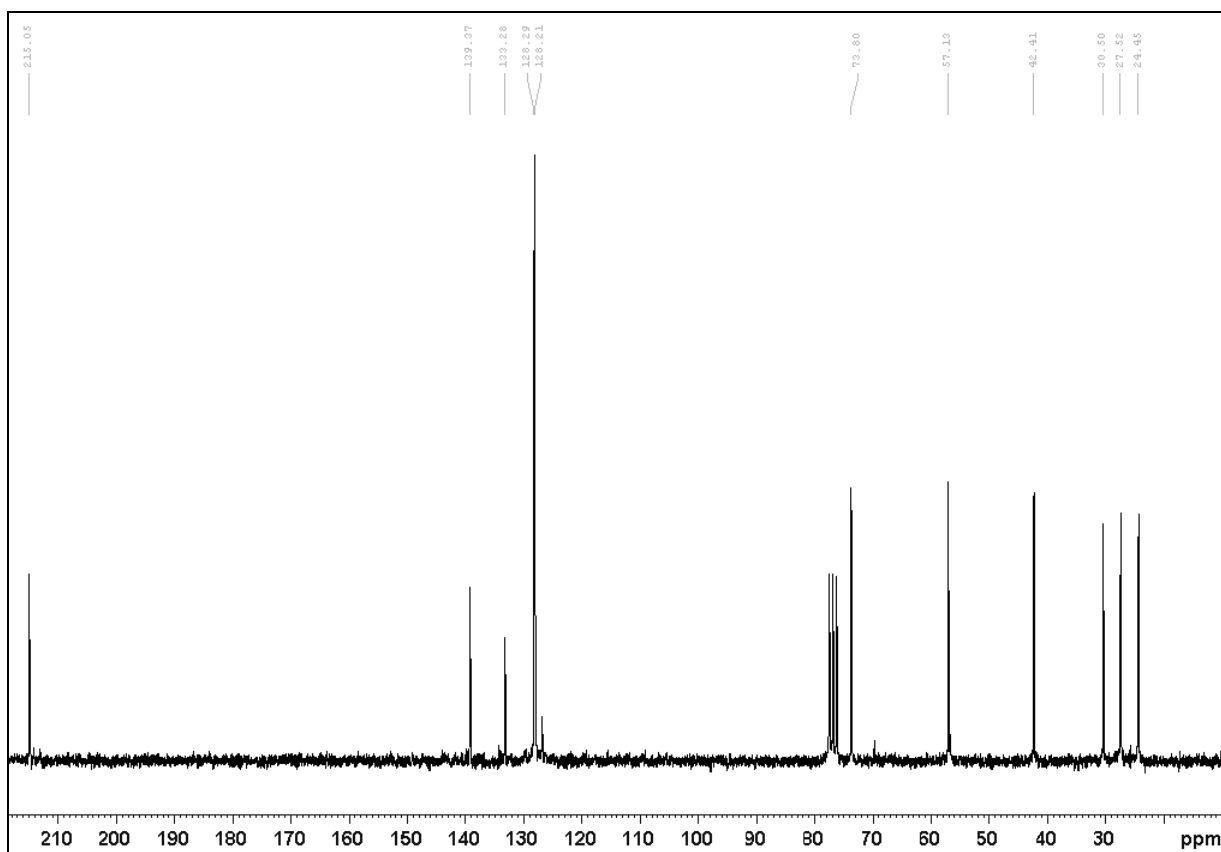

**(*syn*)-2-[(4-Methoxyphenyl)(hydroxy)methyl]cyclohexan-1-one (6b).**

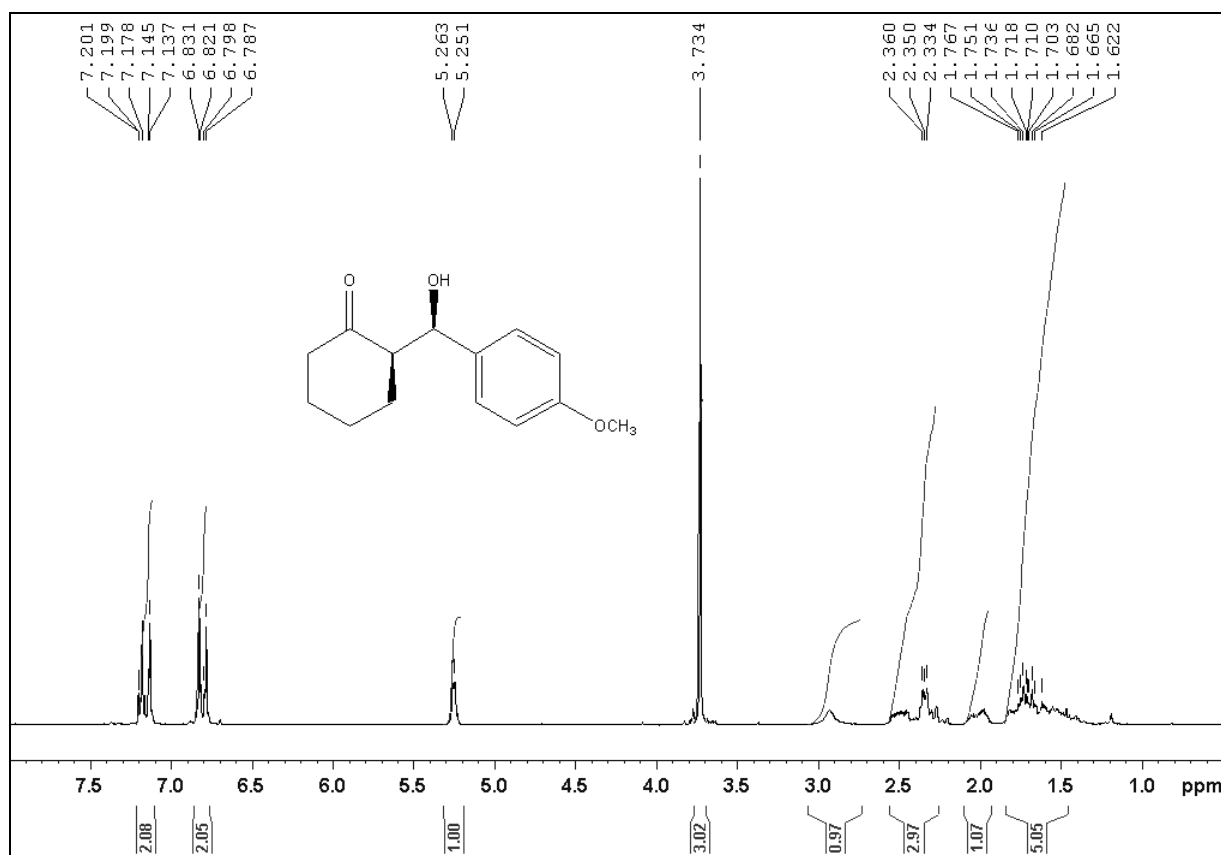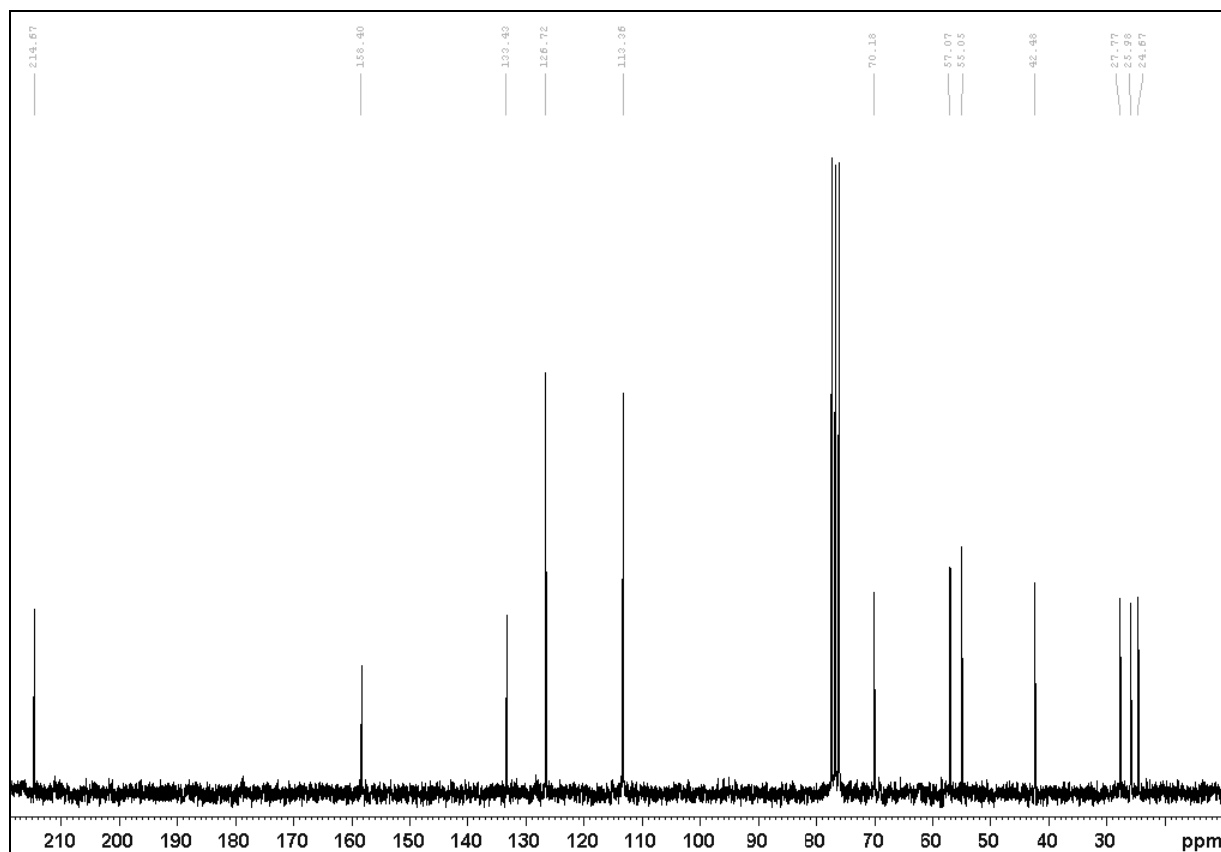

**(anti)-2-[(4-Methoxyphenyl)(hydroxy)methyl]cyclohexan-1-one (6b).**

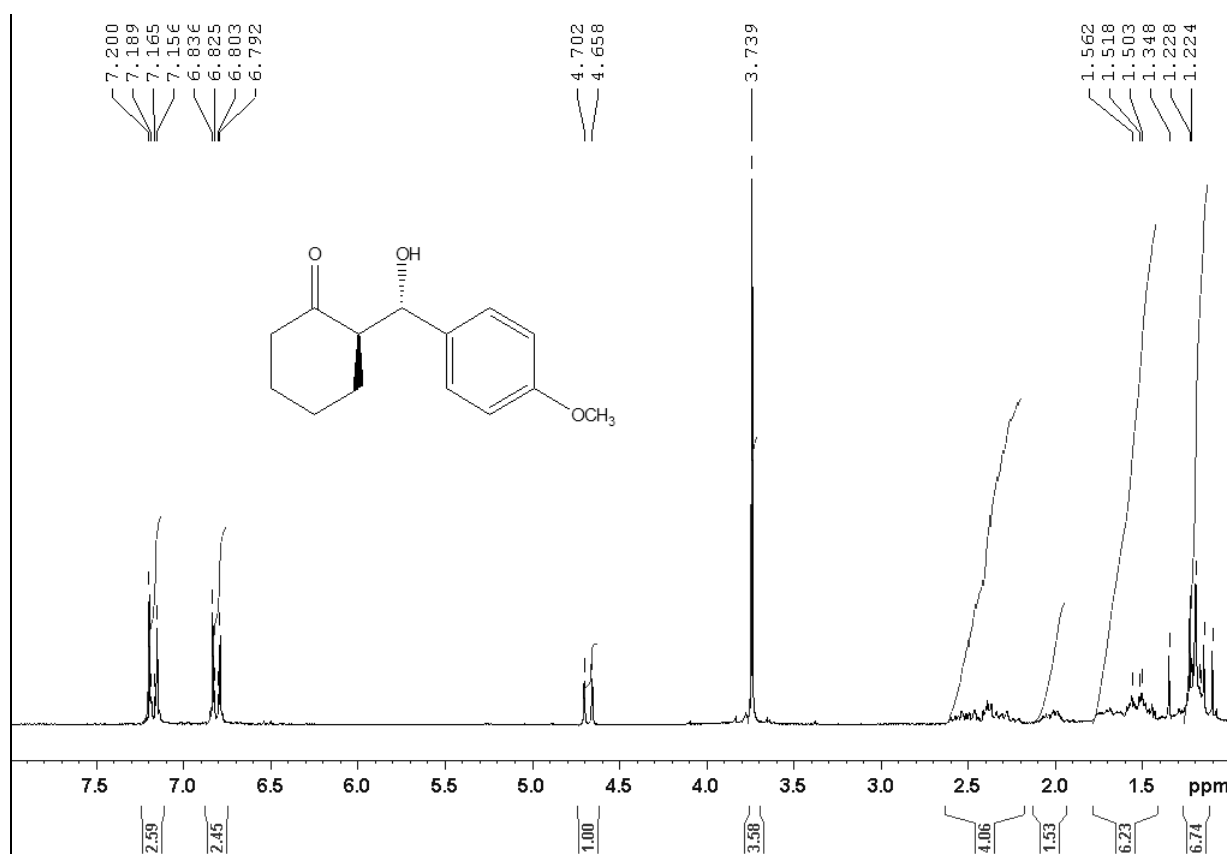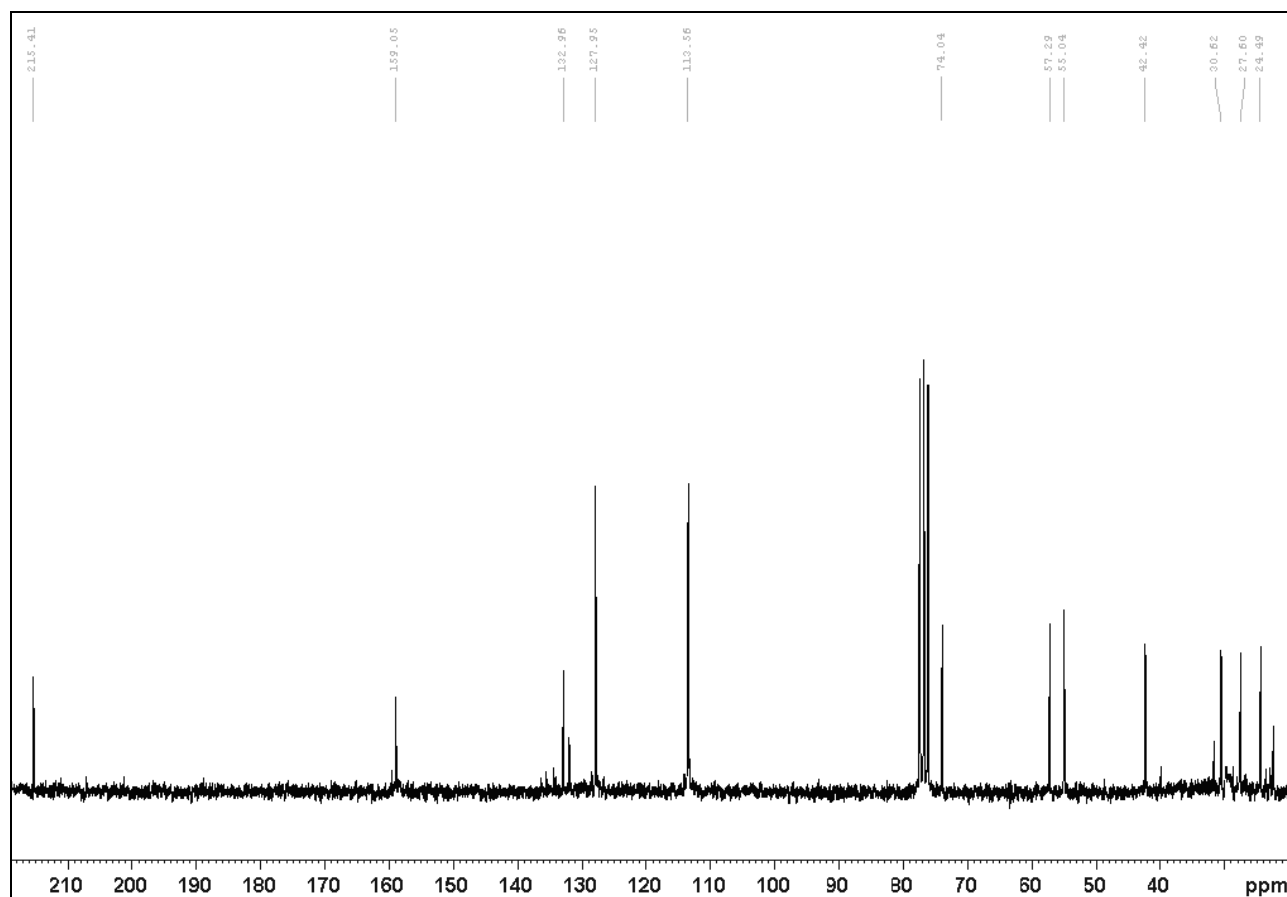

**(*syn*)-2-[(Hydroxy)(phenyl)methyl]cyclohexan-1-one (6c).**

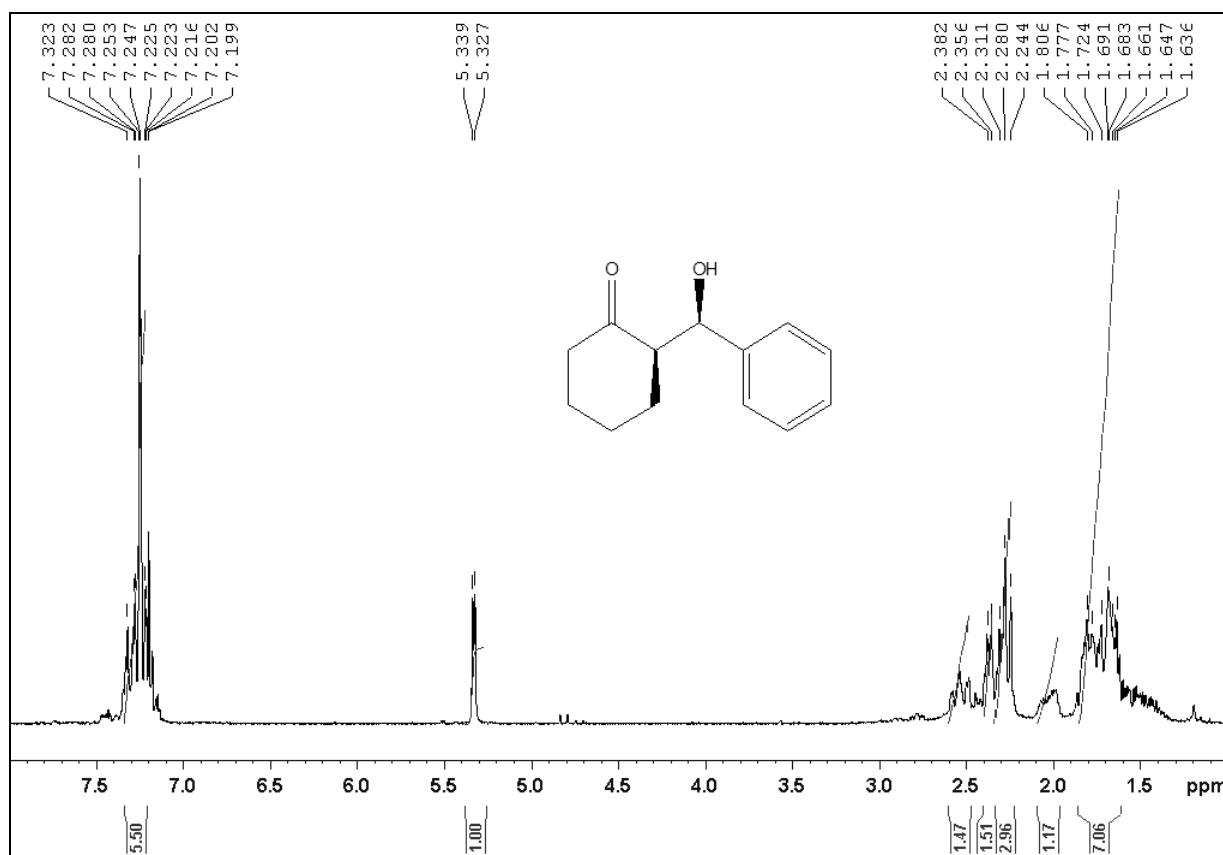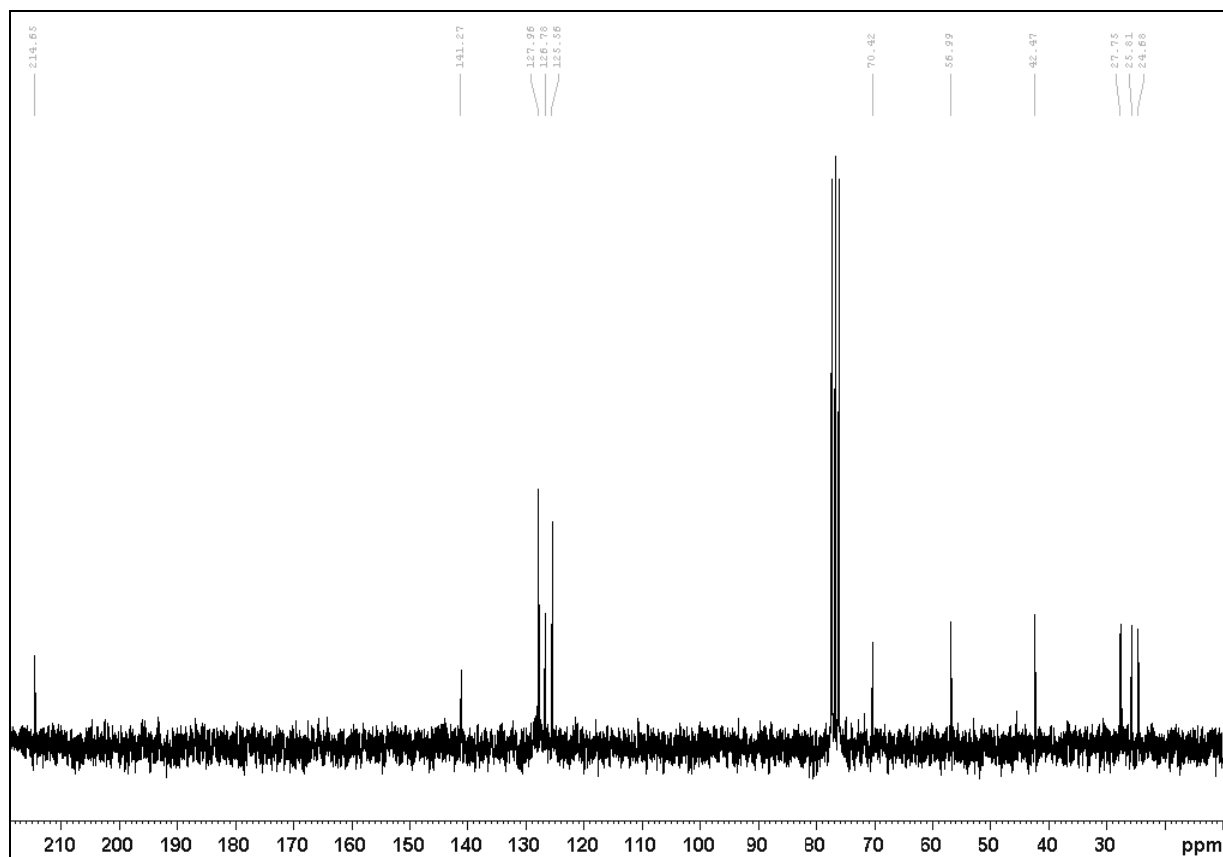

**2-[(Hydroxy)(phenyl)methyl]cyclohexan-1-one (6c).**

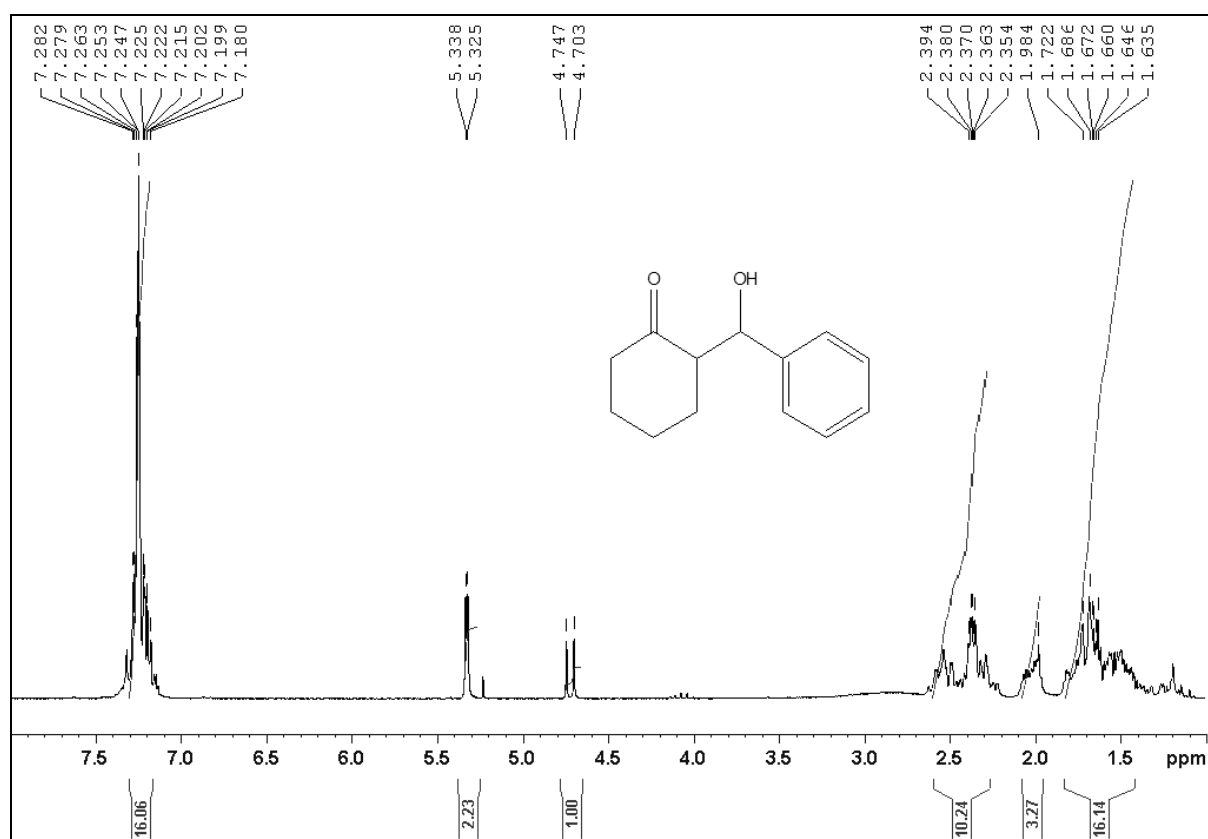

**(*syn*)-2-[(Hydroxy)(4-nitrophenyl)methyl]cyclohexan-1-one (6d).**

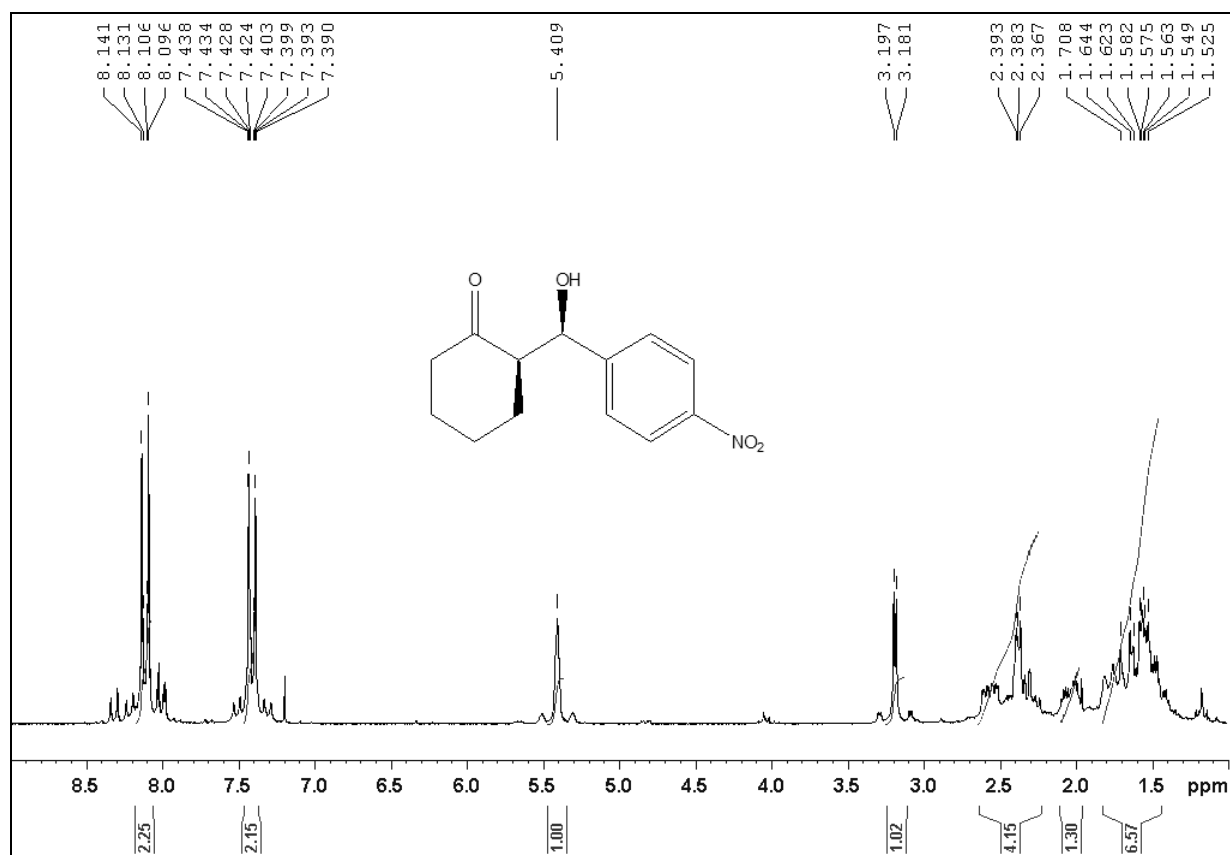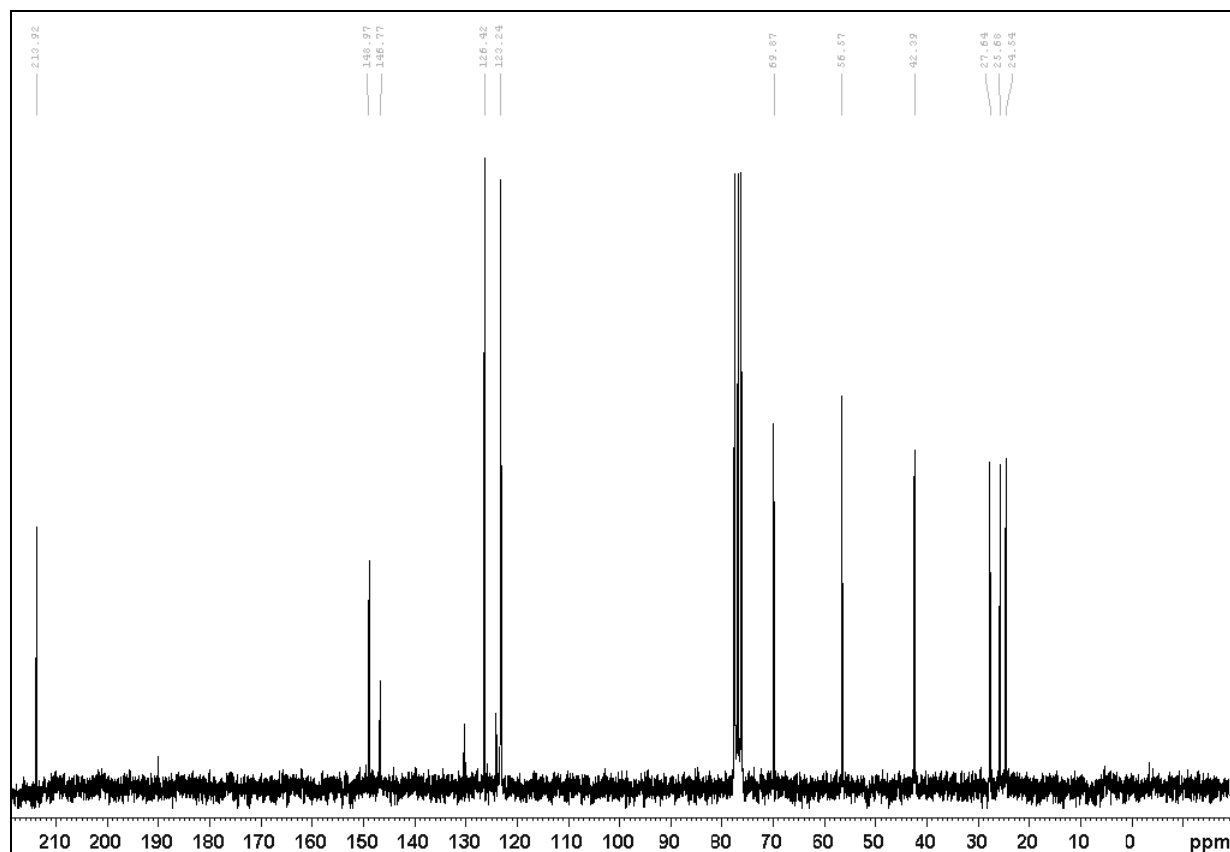



**2-[(Hydroxy)(4-nitrophenyl)methyl]cyclohexan-1-one (6d).**

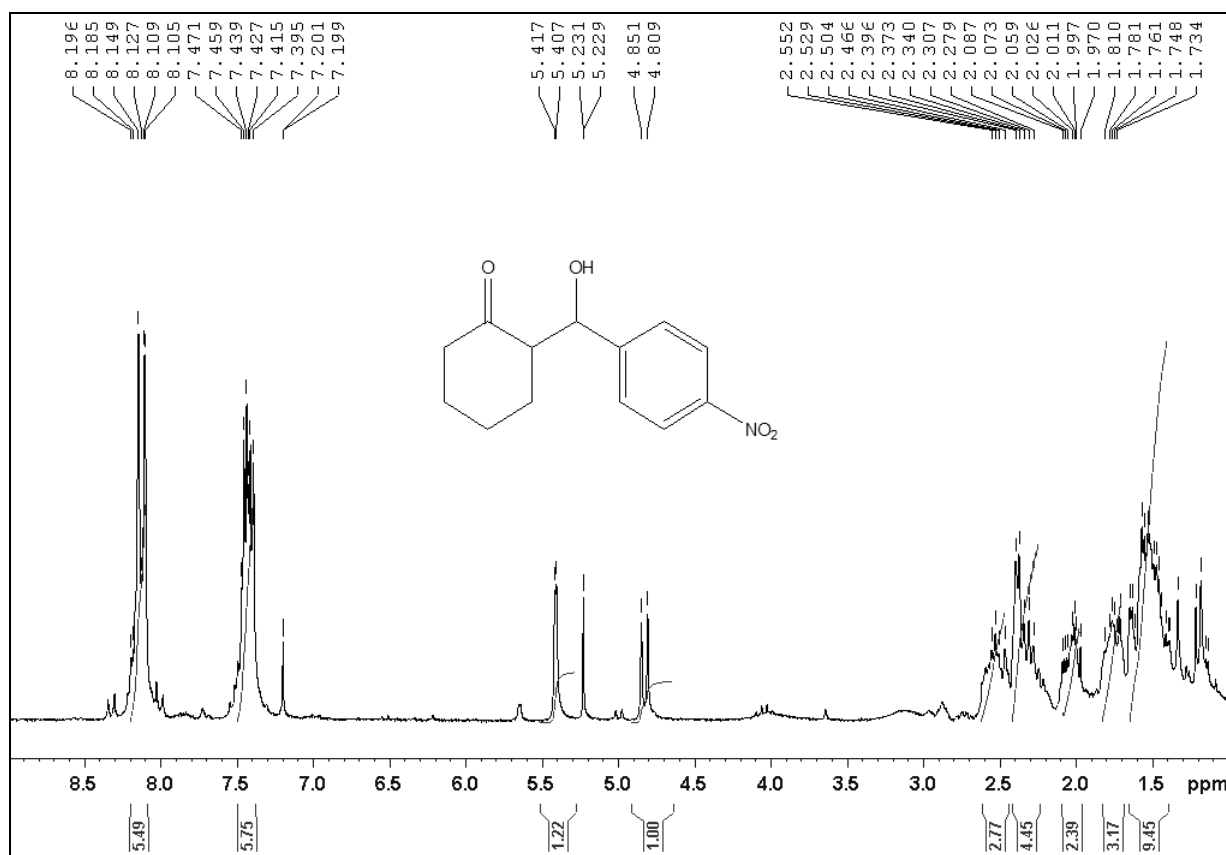

**(*syn*)-2-[(Hydroxy)(4-cyanophenyl)methyl]cyclohexan-1-one (6e).**

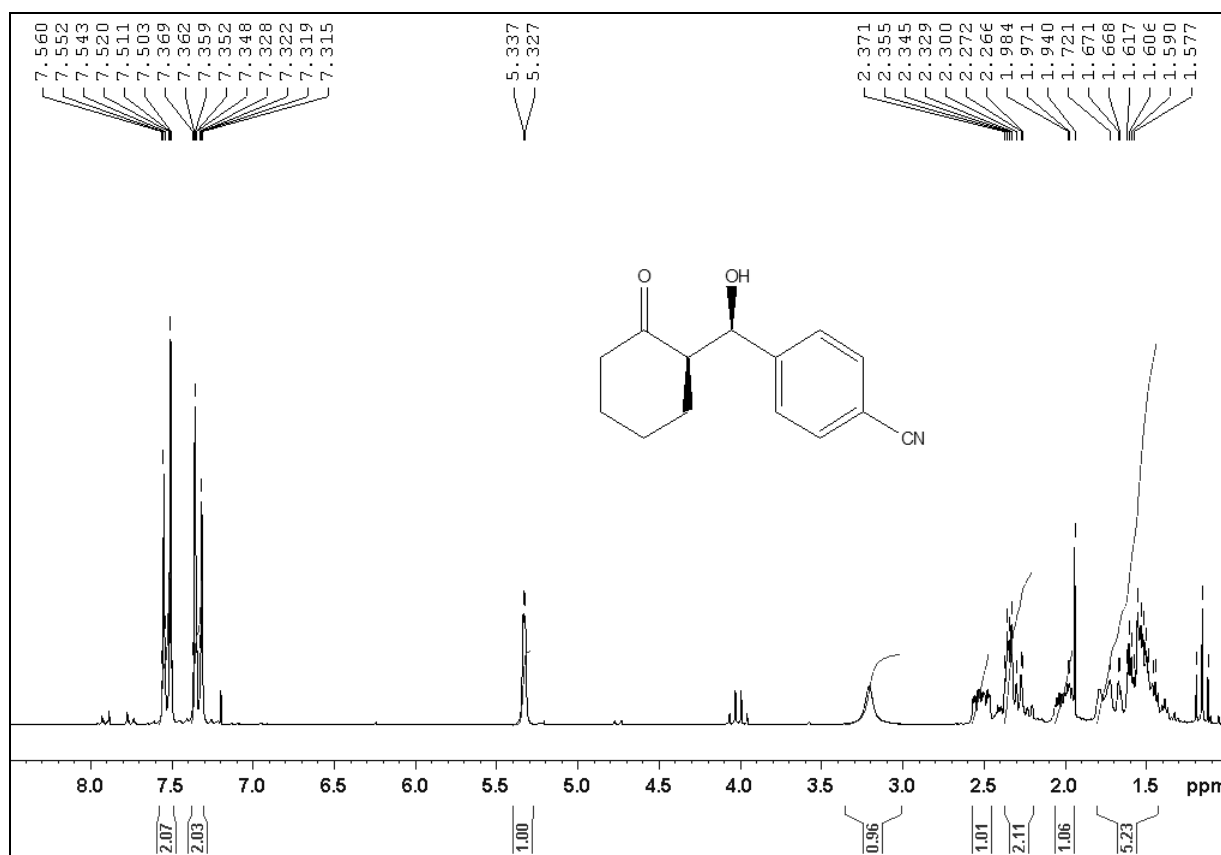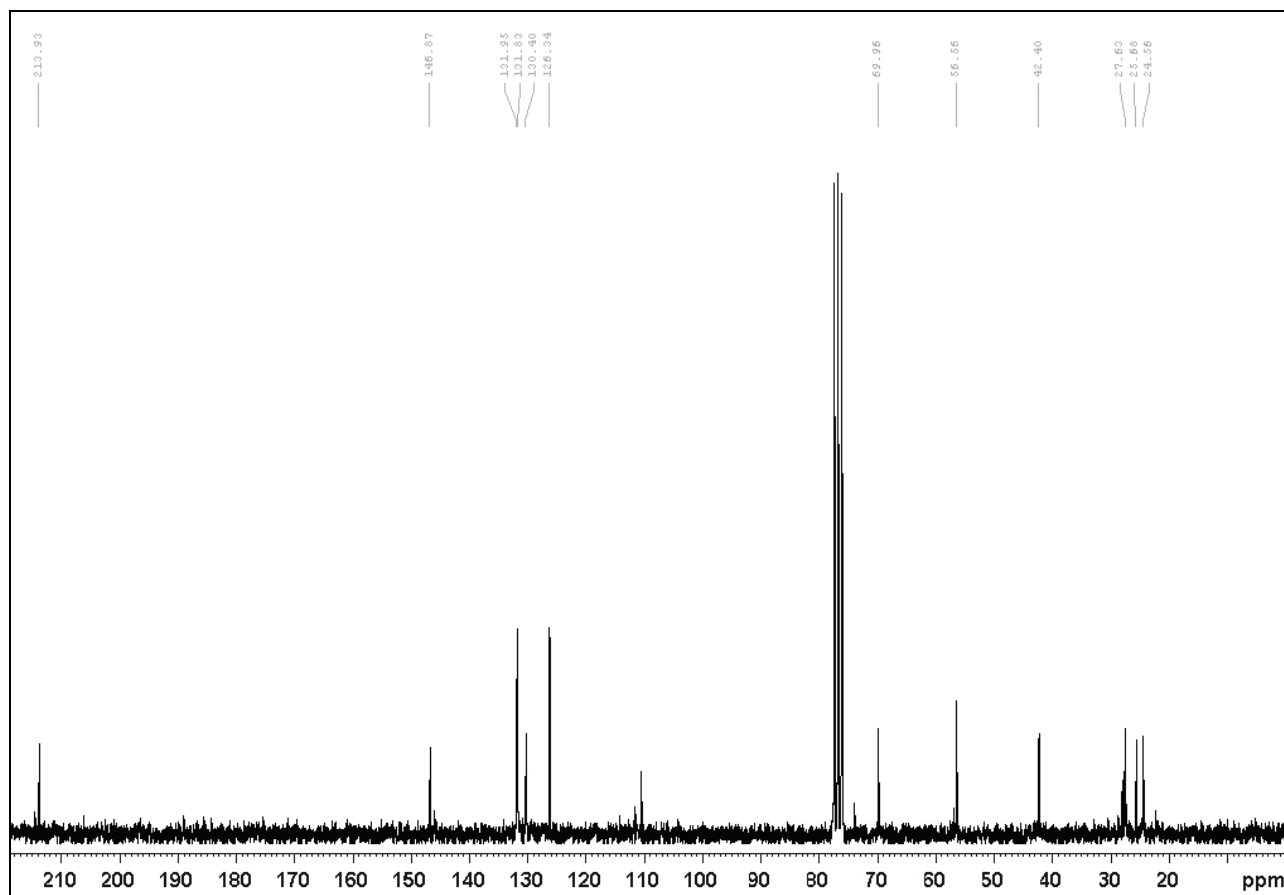

**2-[(Hydroxy)(4-cyanophenyl)methyl]cyclohexan-1-one (6e).**

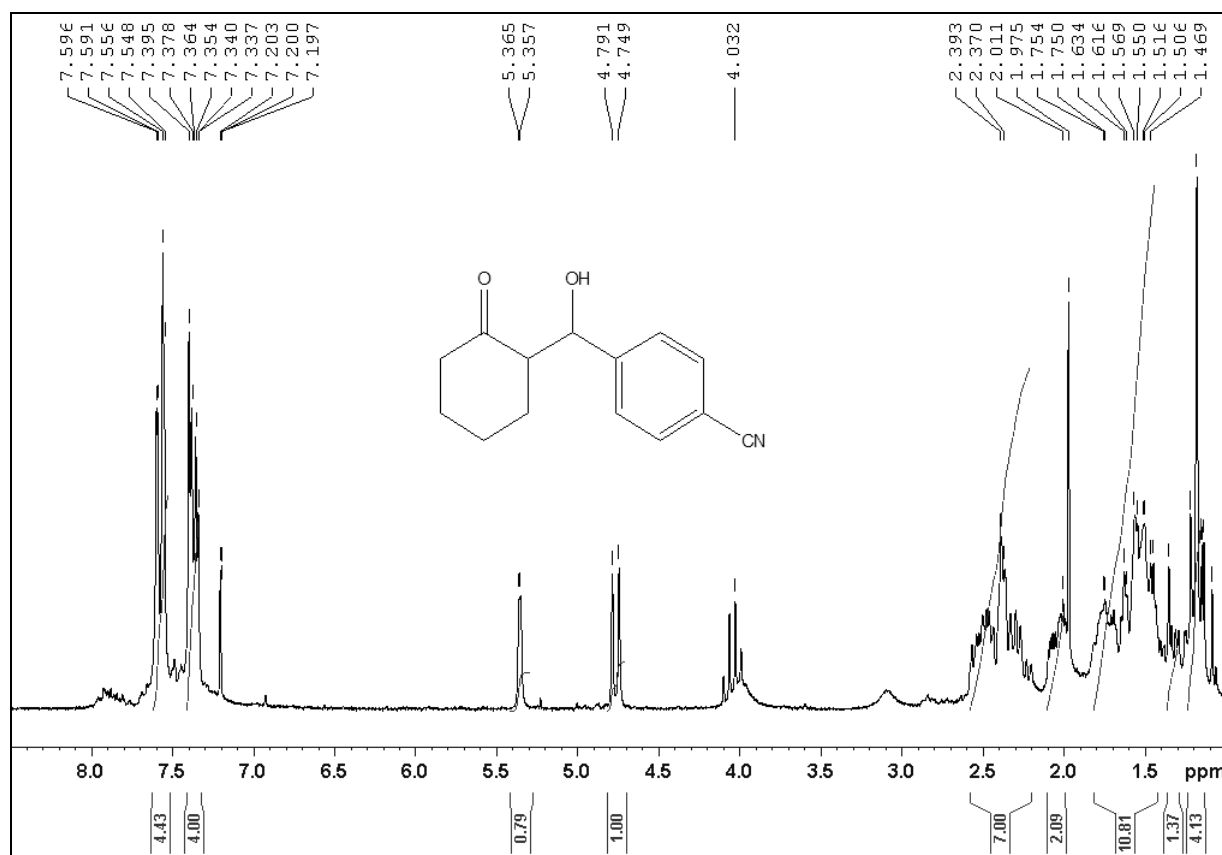

**3-(4-Chlorophenyl)-3-hydroxy-1-phenylpropan-1-one (9a).**

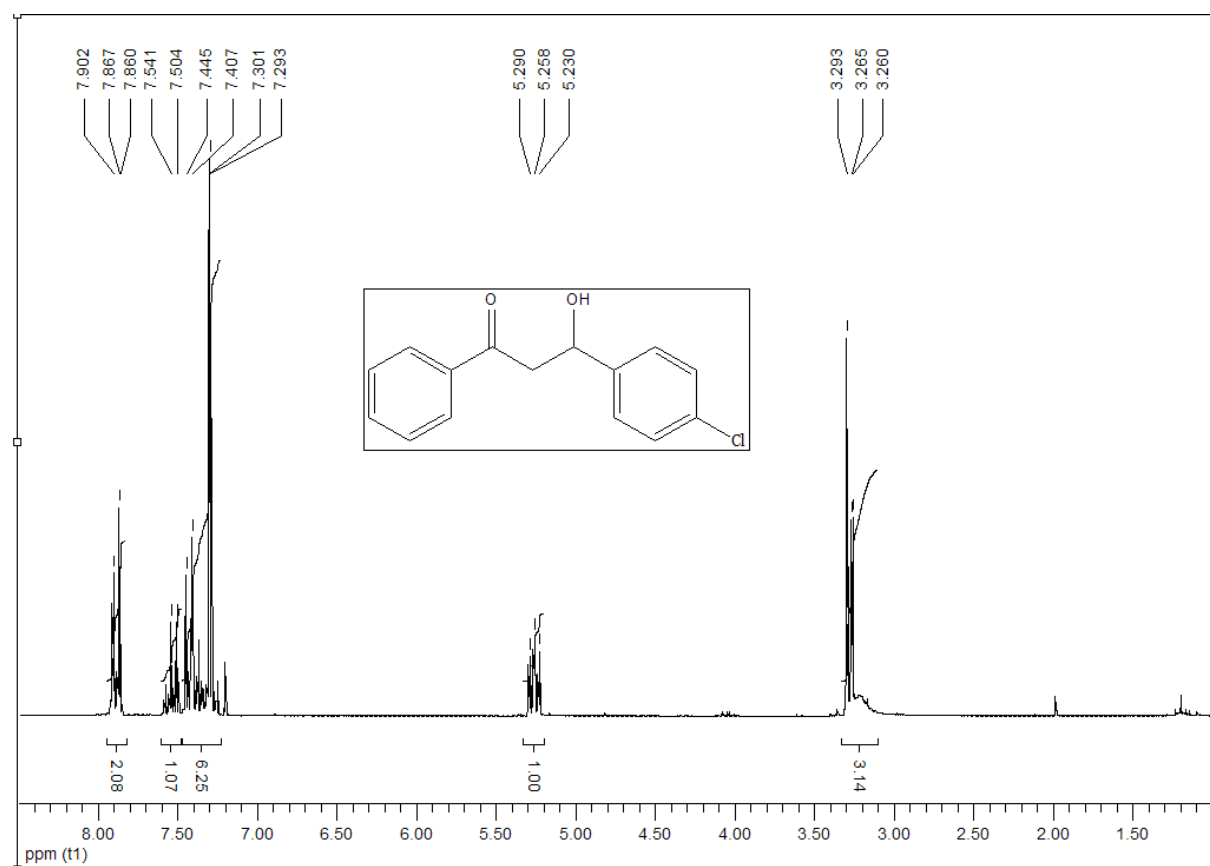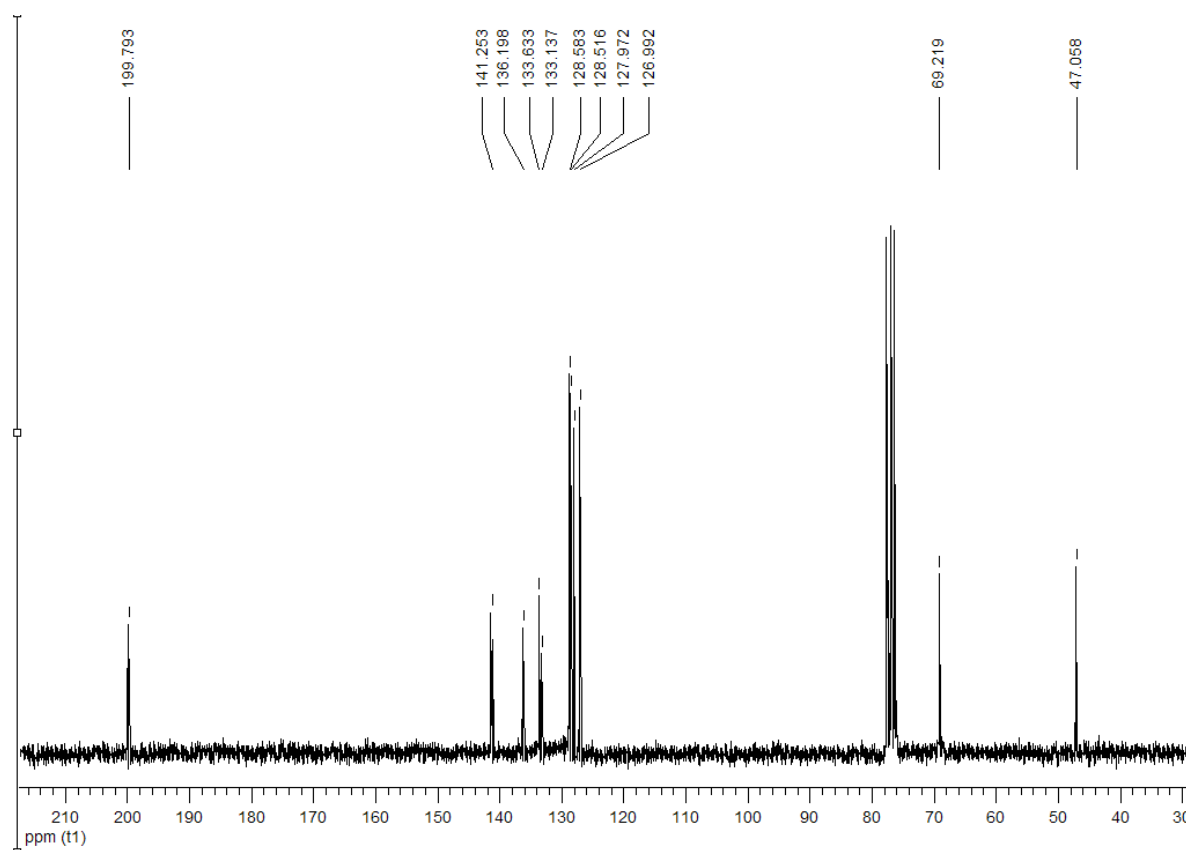

**3-Hydroxy-3-(4-methoxyphenyl)-1-phenylpropan-1-one (9b).**

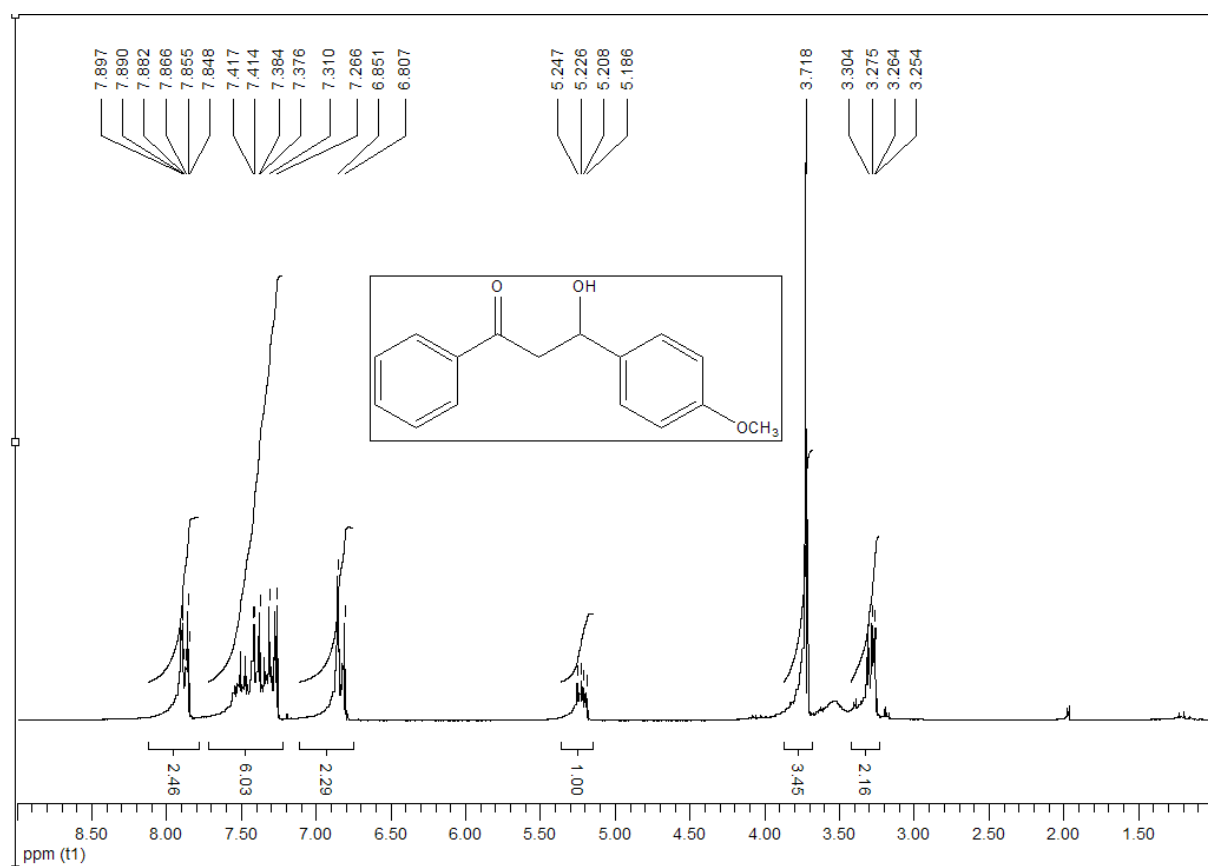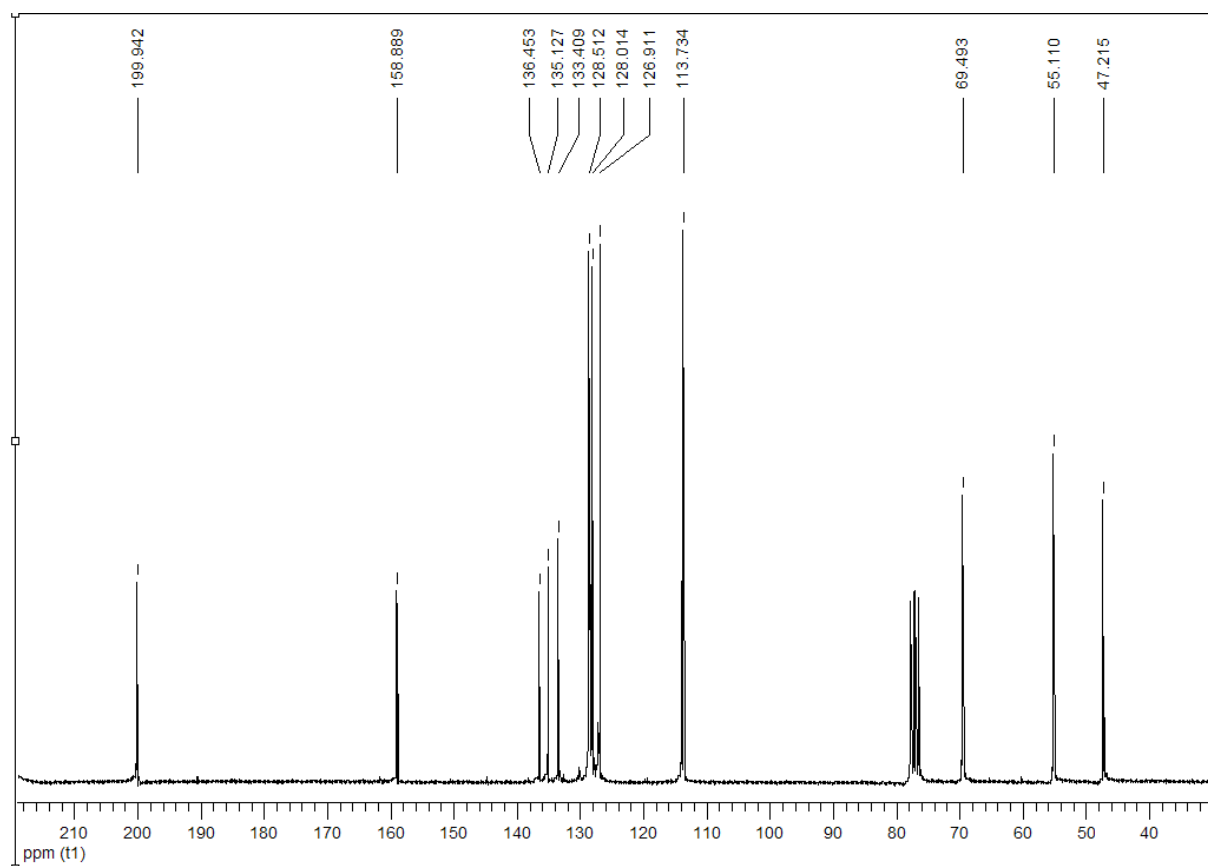

### 3-Hydroxy-1,3-diphenylpropan-1-one (9c).

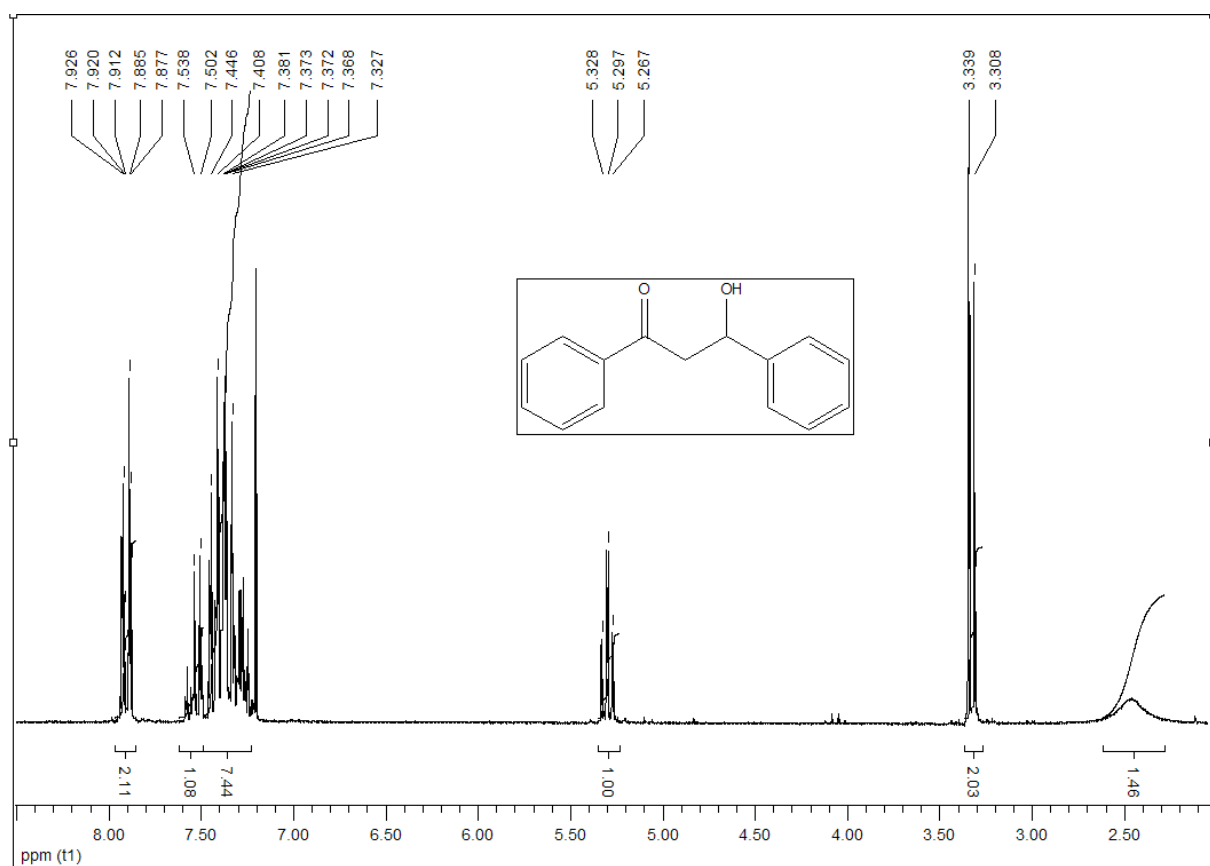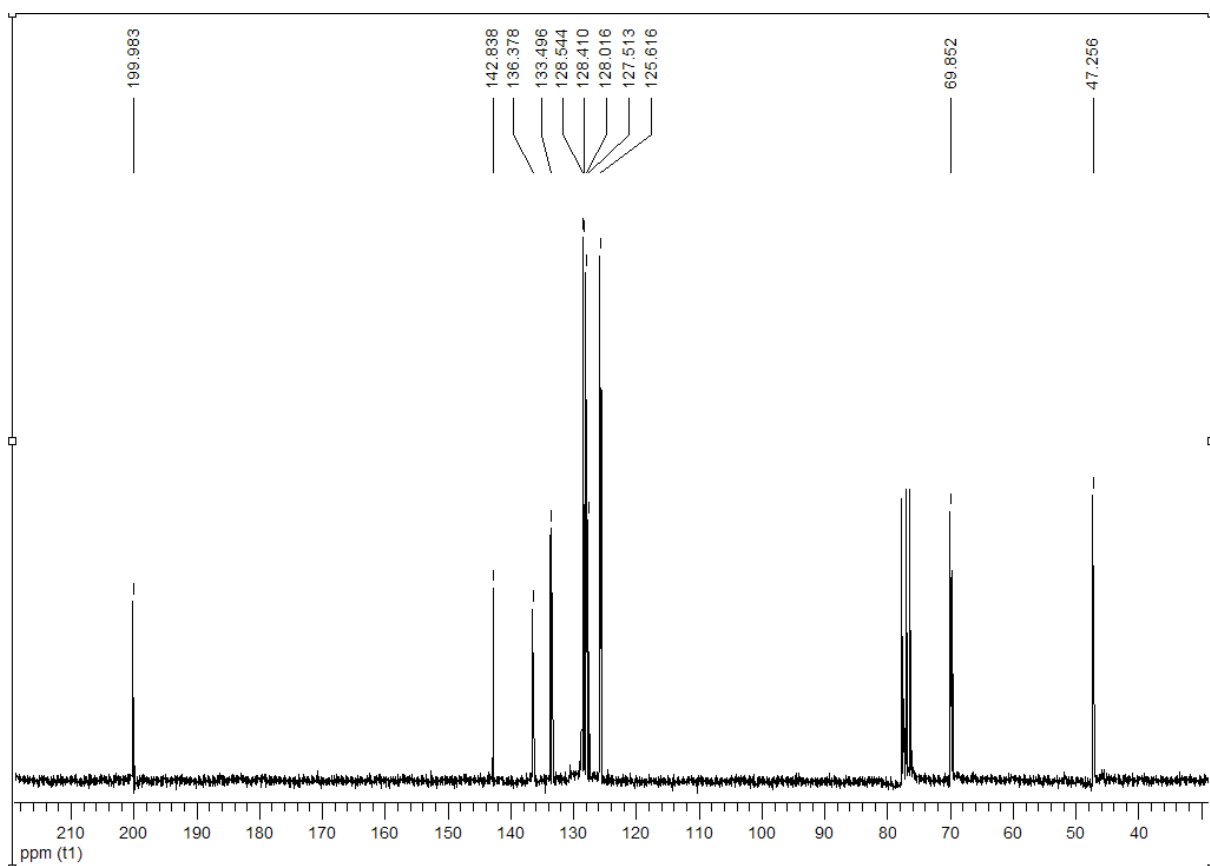

**3-Hydroxy-3-(4-nitrophenyl)-1-phenylpropan-1-one (9d).<sup>8,9,6</sup>**

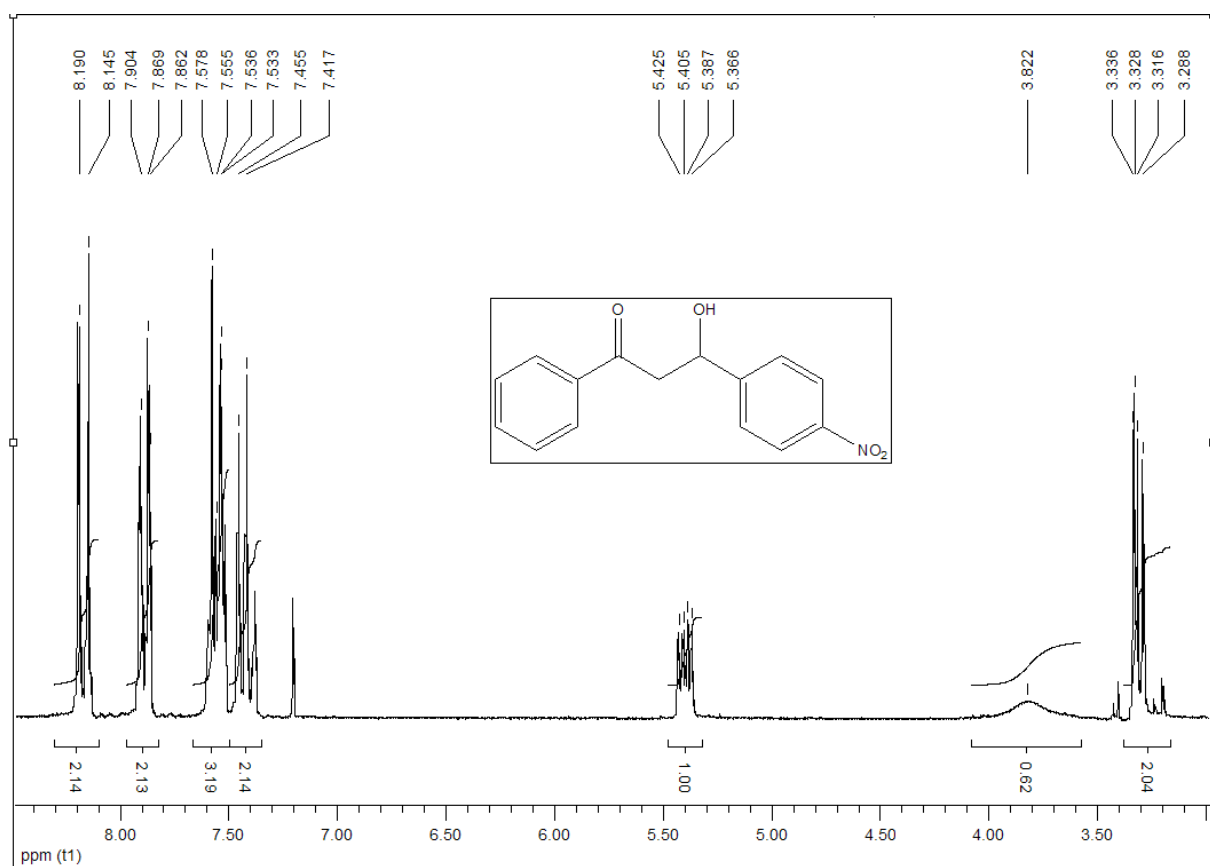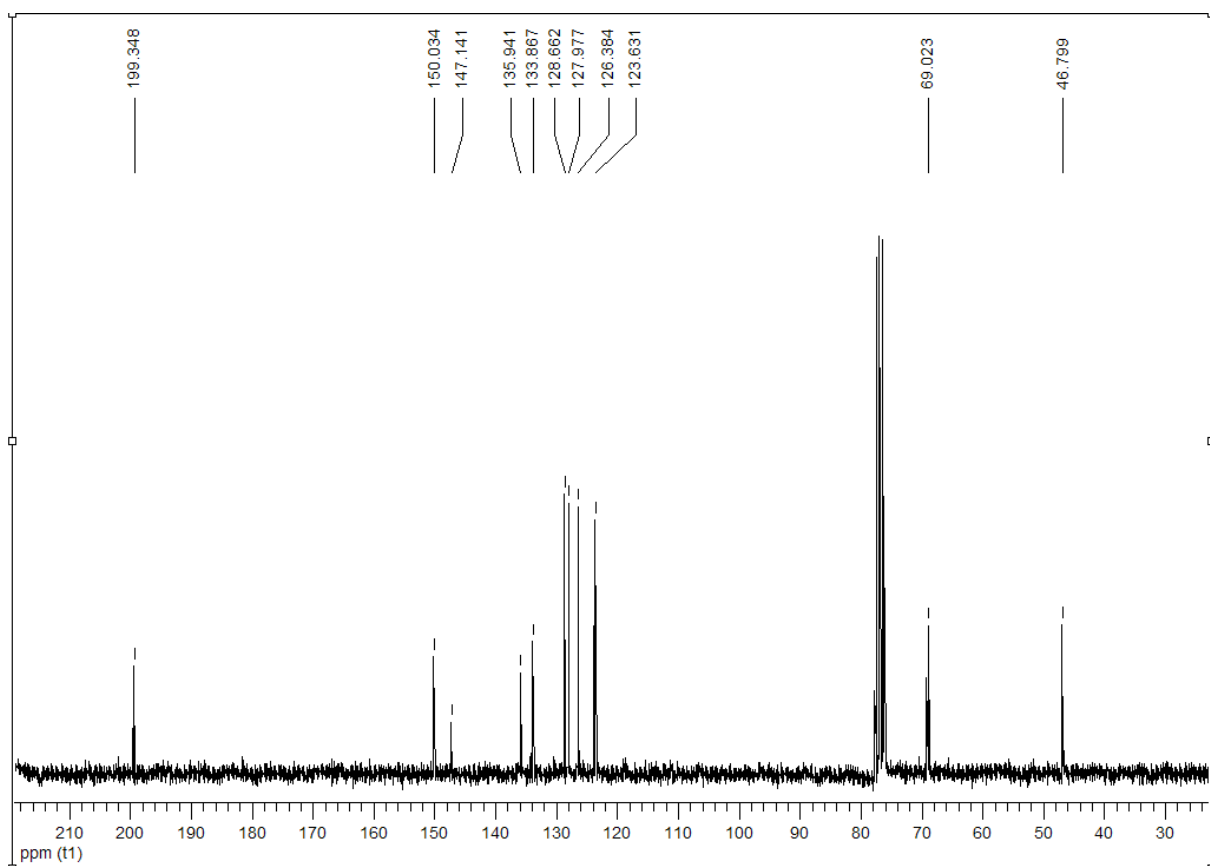

**3-(4-Cyanophenyl)-3-hydroxy-1-phenylpropan-1-one (9e).**

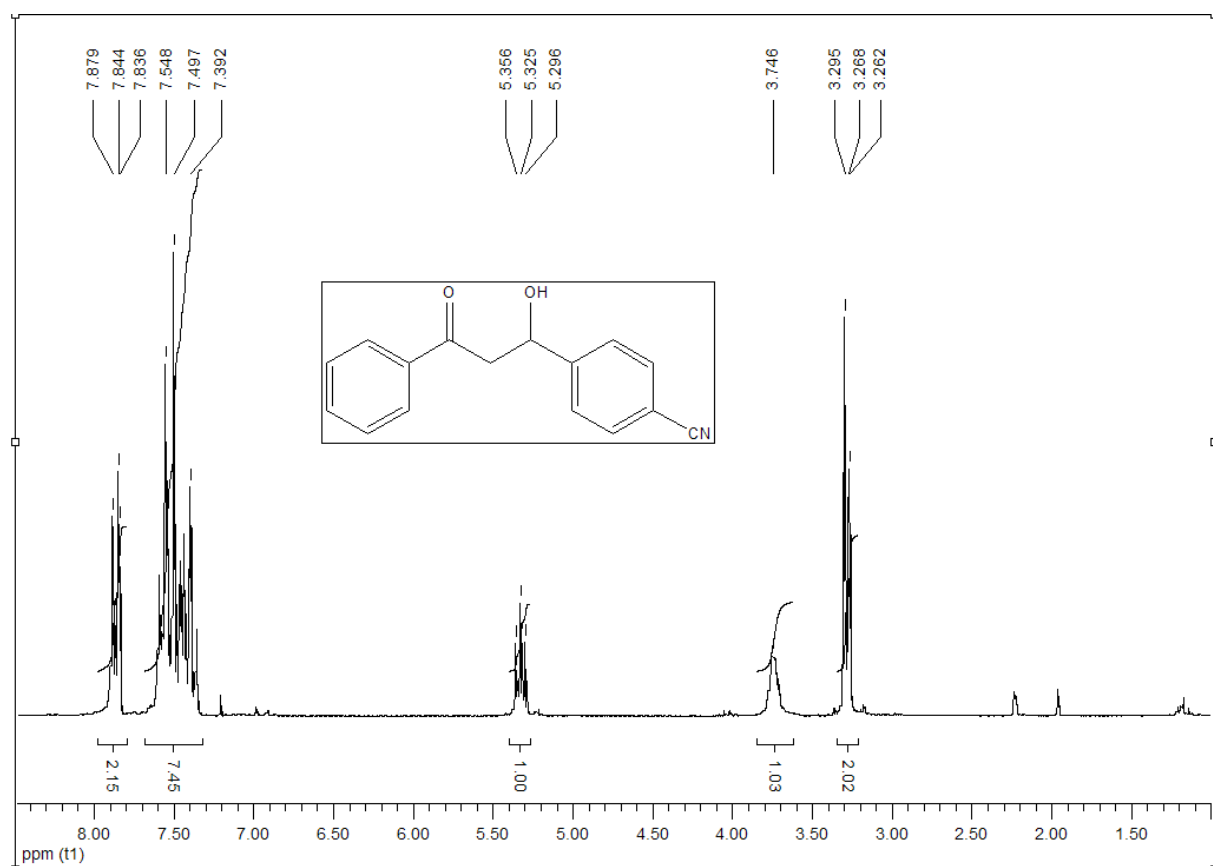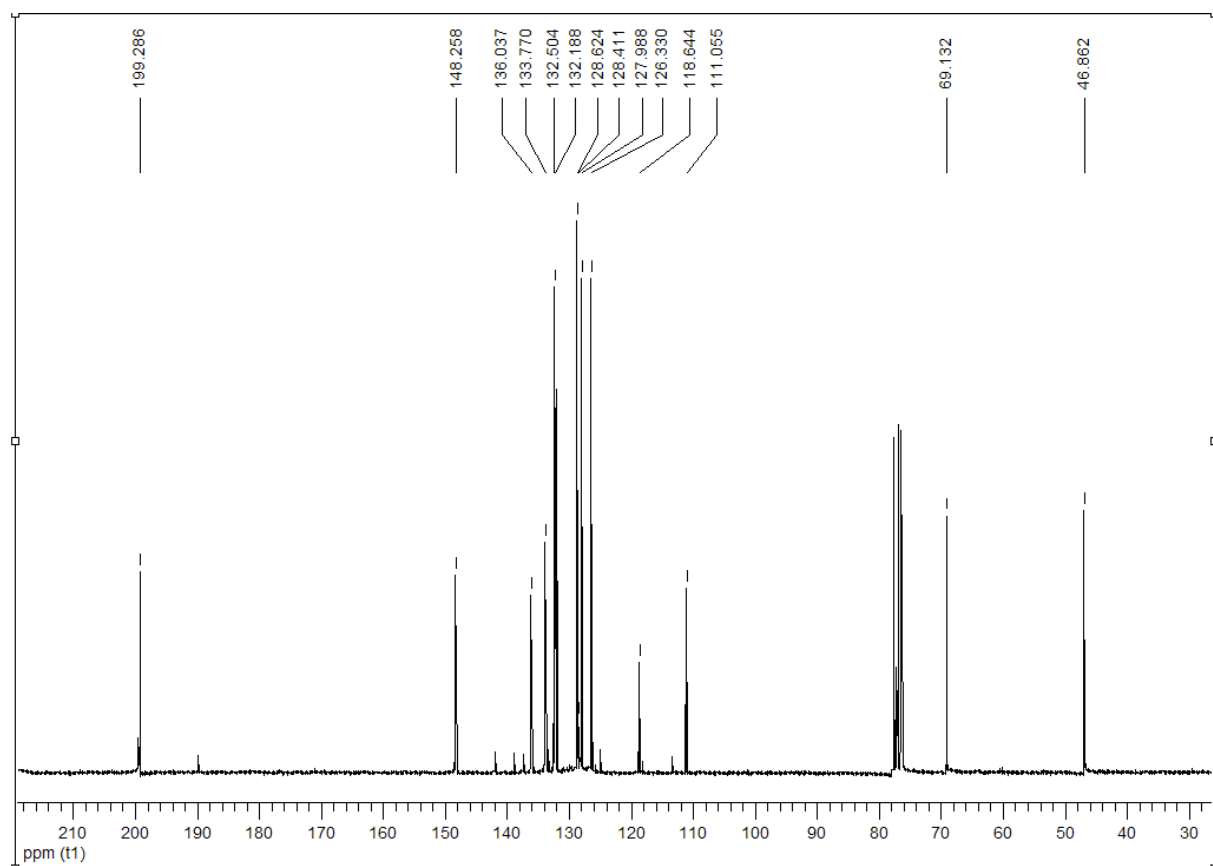



### 3-Hydroxy-3-(2-tolyl)-1-phenylpropan-1-one (9f).

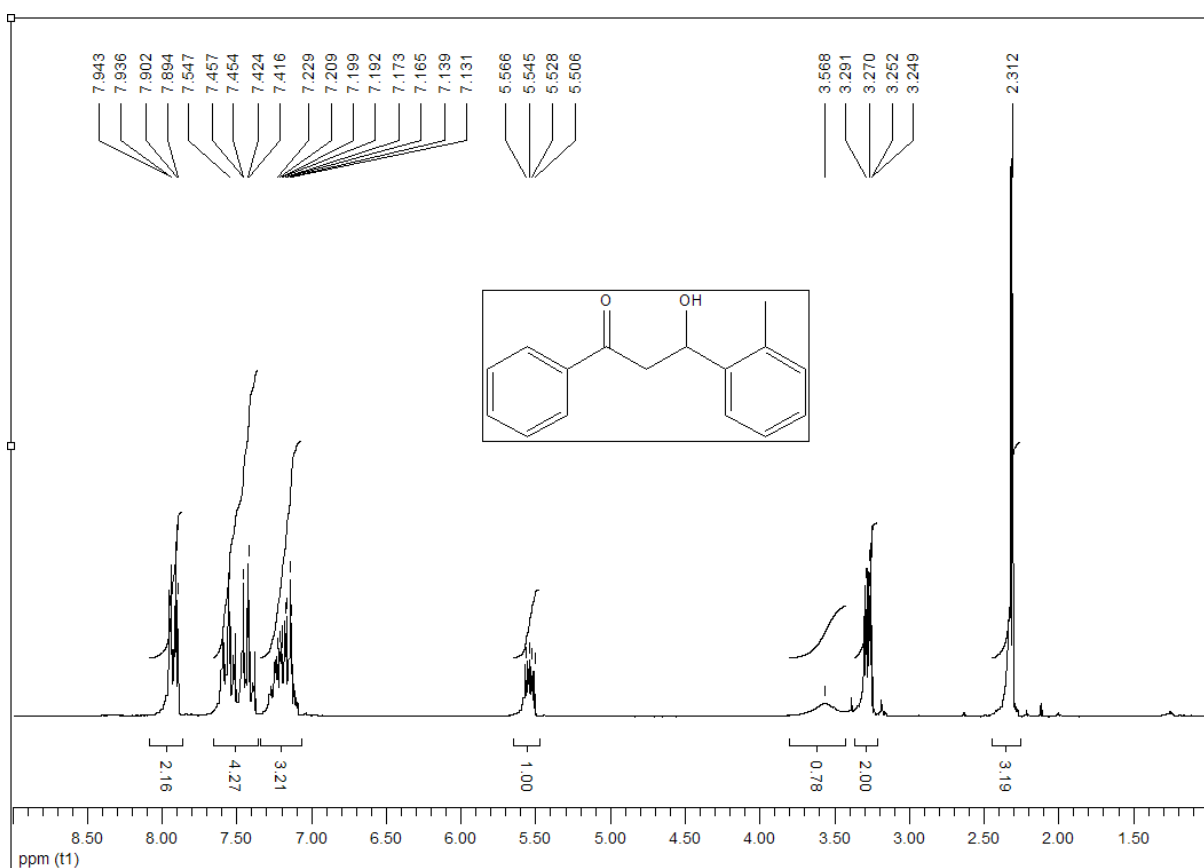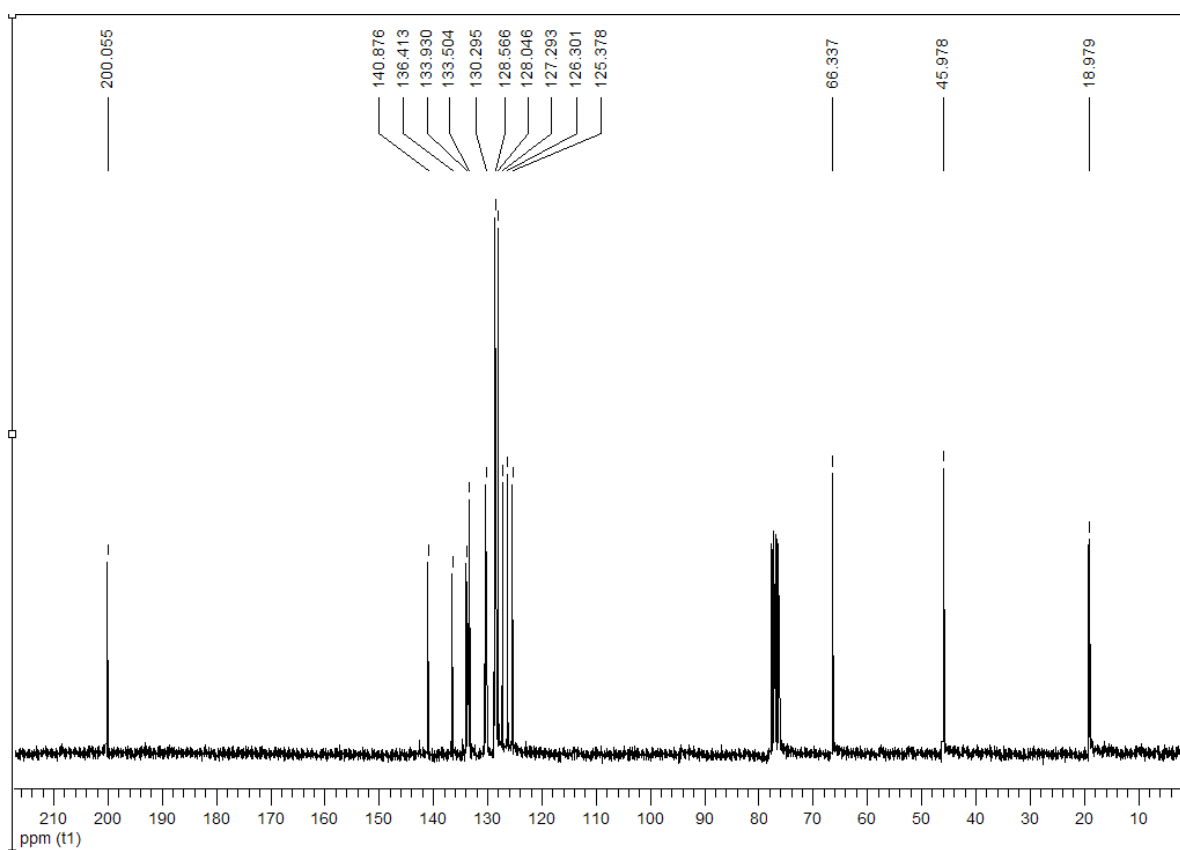

**3-Hydroxy-1-phenyl-3-(2-trifluoromethylphenyl)propan-1-one (9g).**

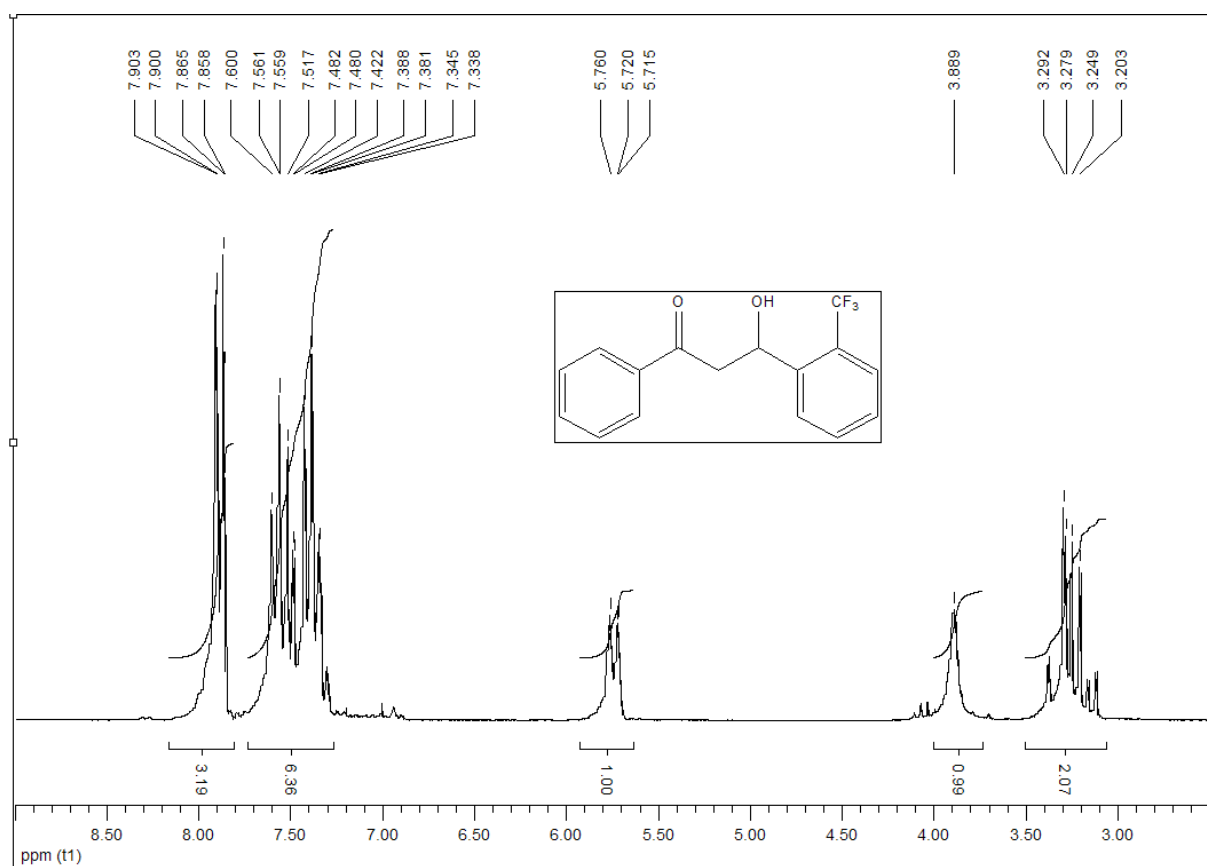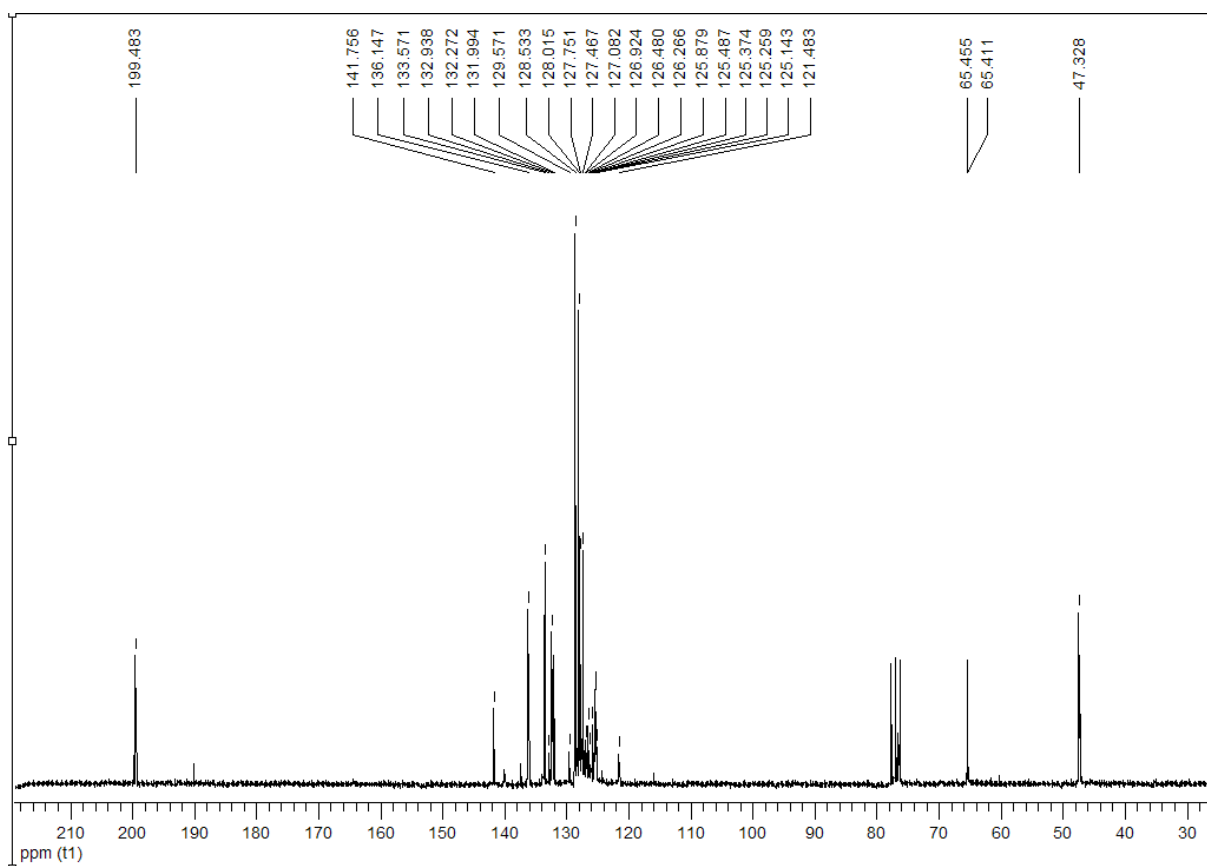

### 3-Hydroxy-3-(2-thienyl)-1-phenylpropan-1-one (9h).

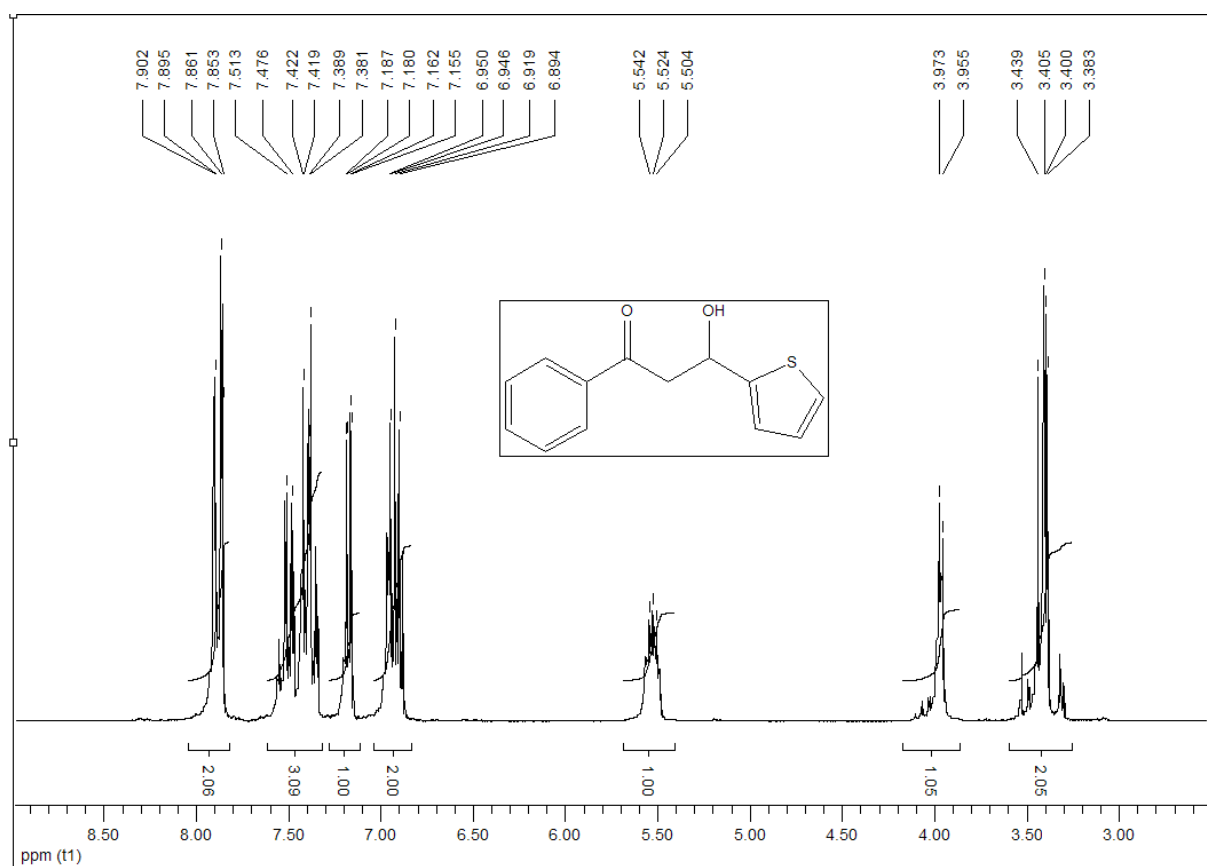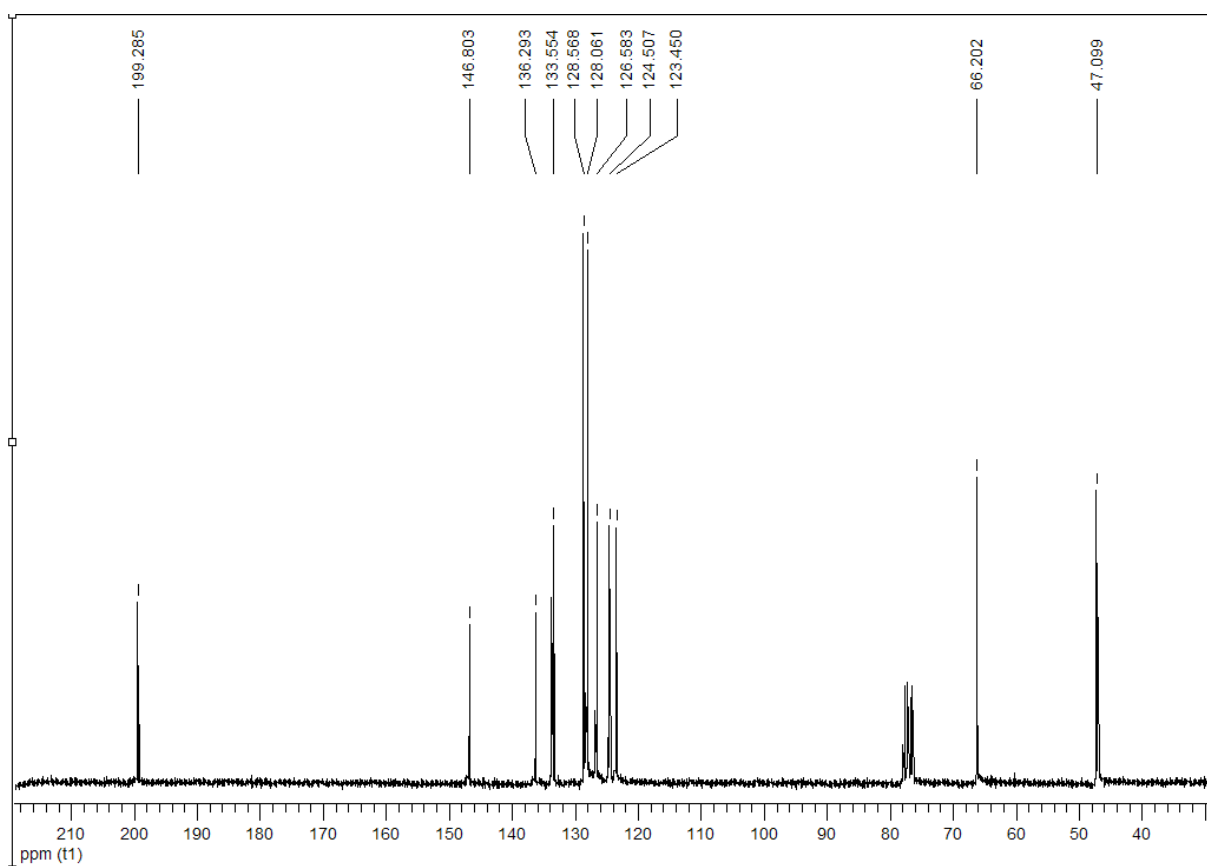

**(*trans*)-3-Hydroxy-1,5-diphenylpent-4-en-1-one (9i).**

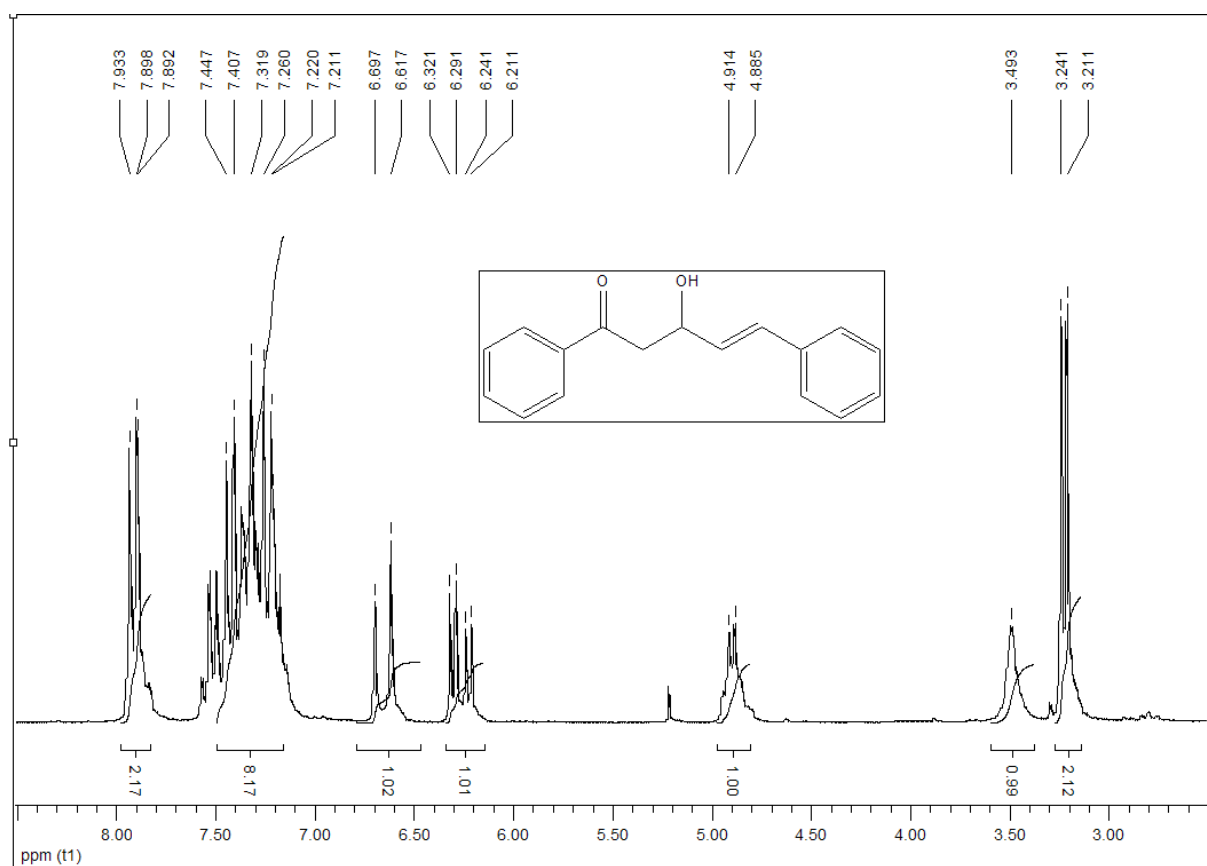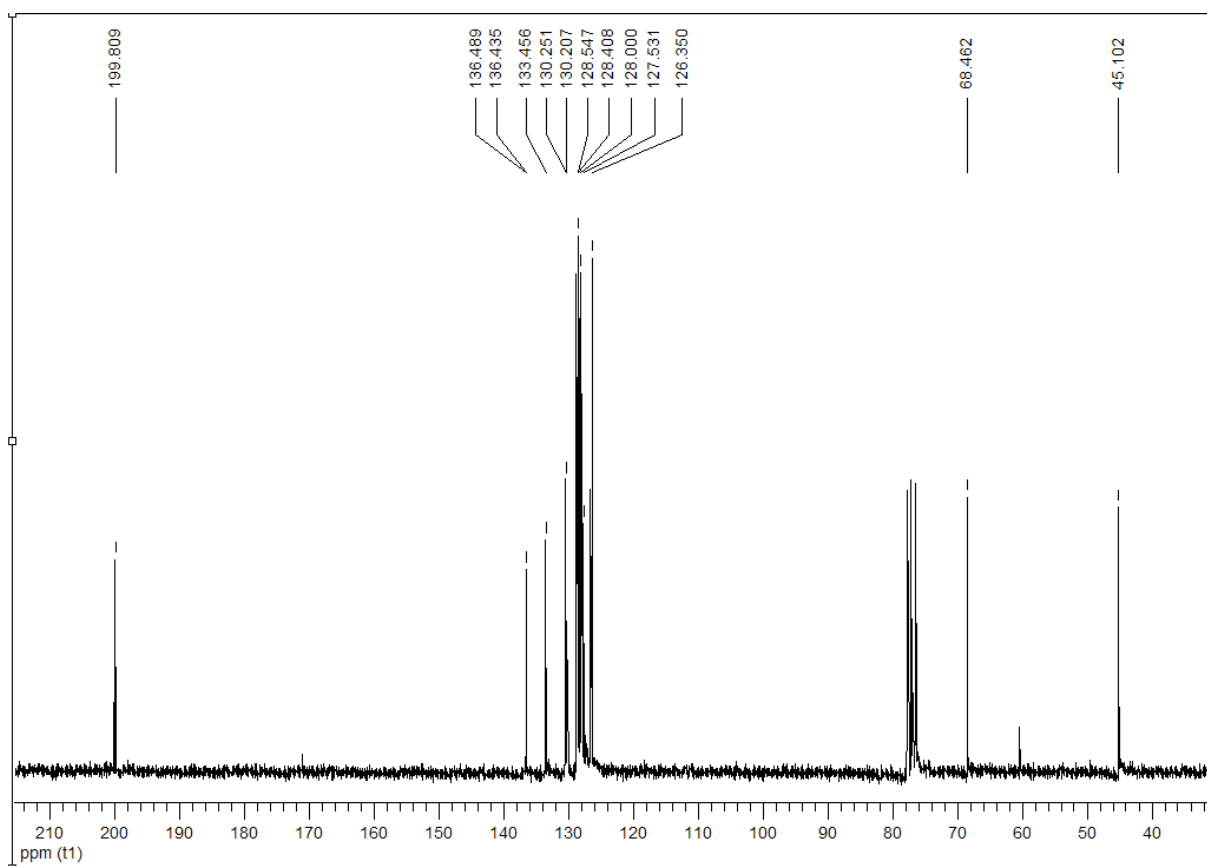

# 5-Oxo-3,5-diphenylpentanal (10)

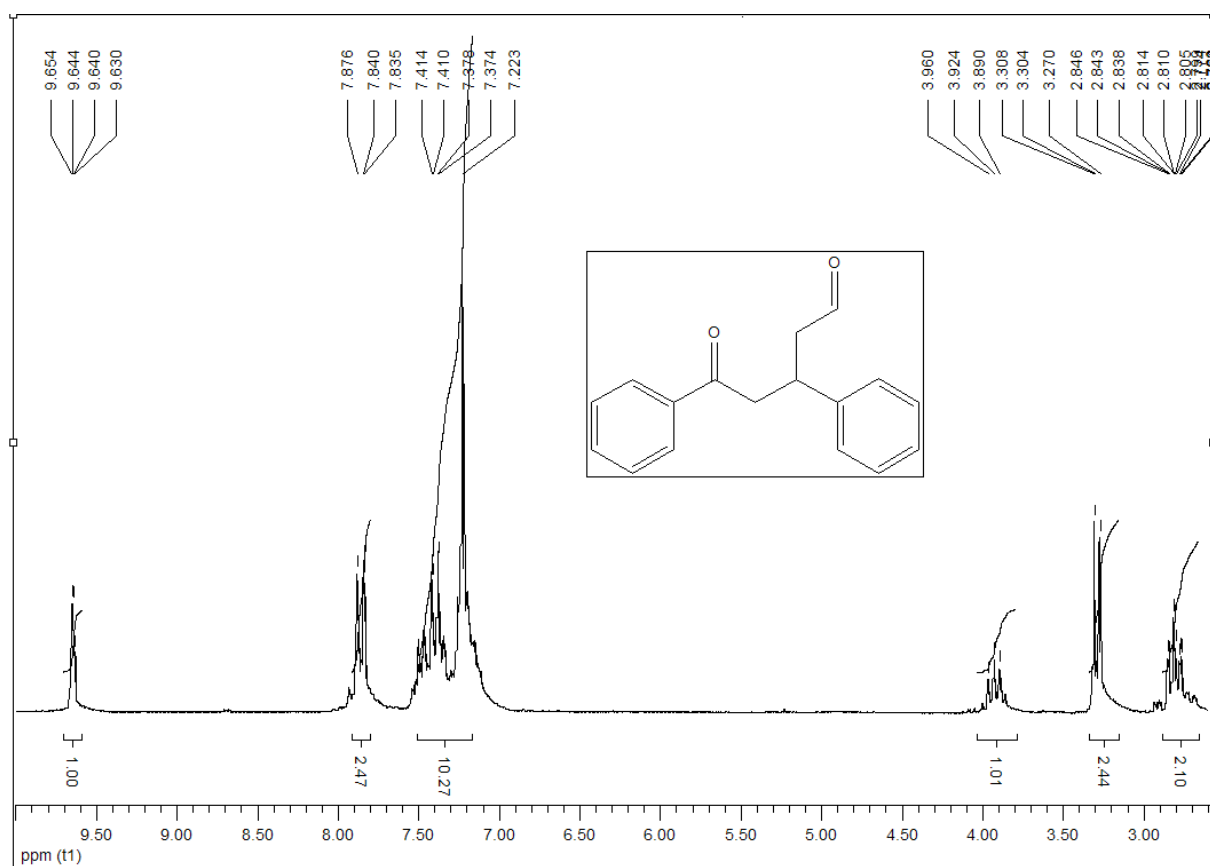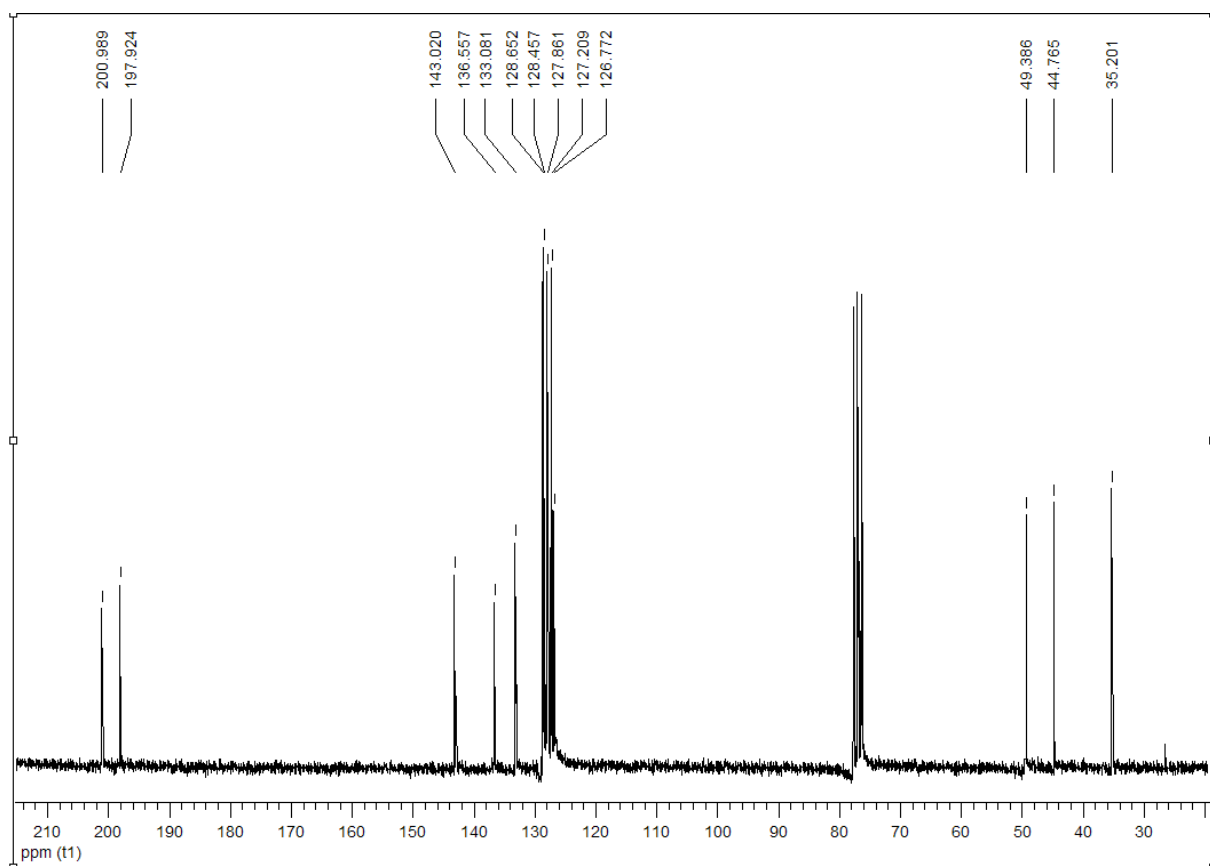

### 3-Hydroxy-1-phenyloctan-1-one (12).

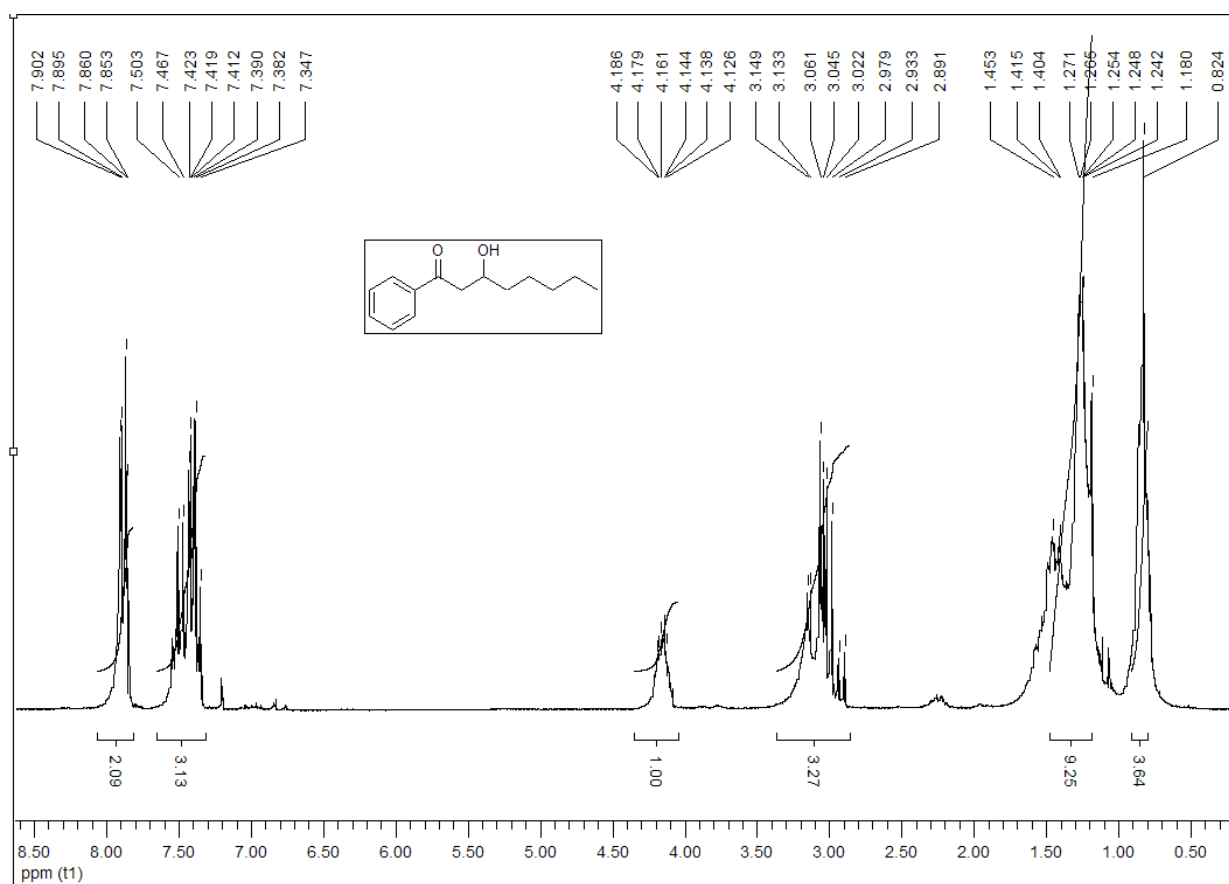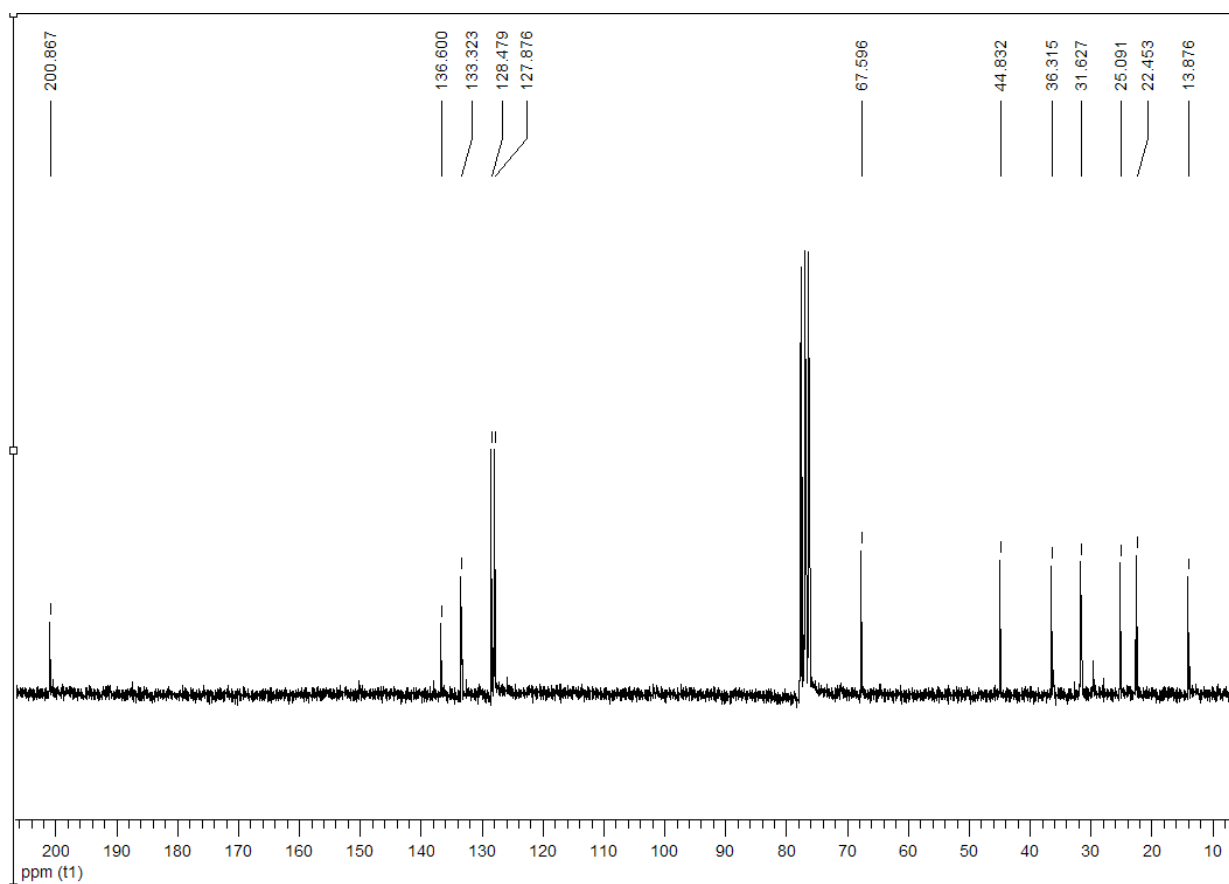

# Cyclohexanecarbaldehyde dimethyl acetal (13b)

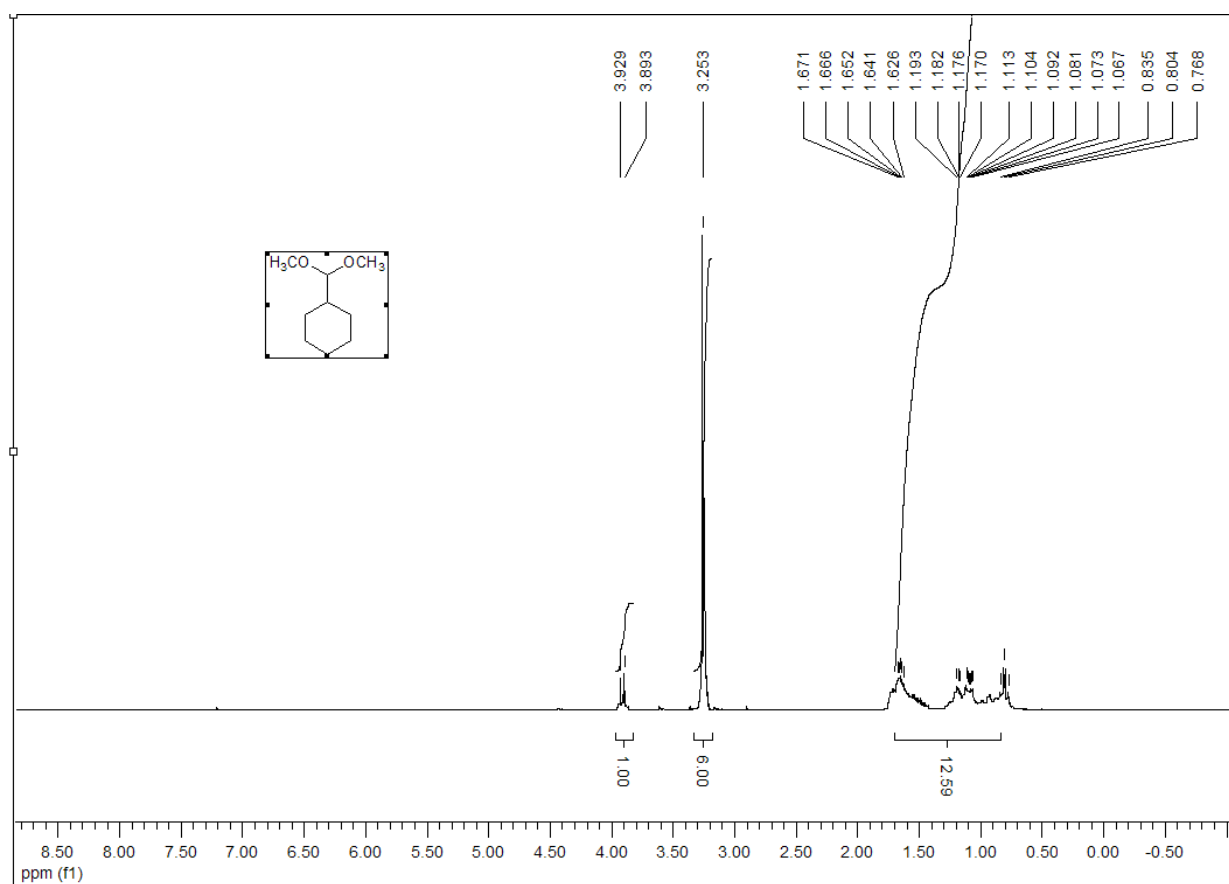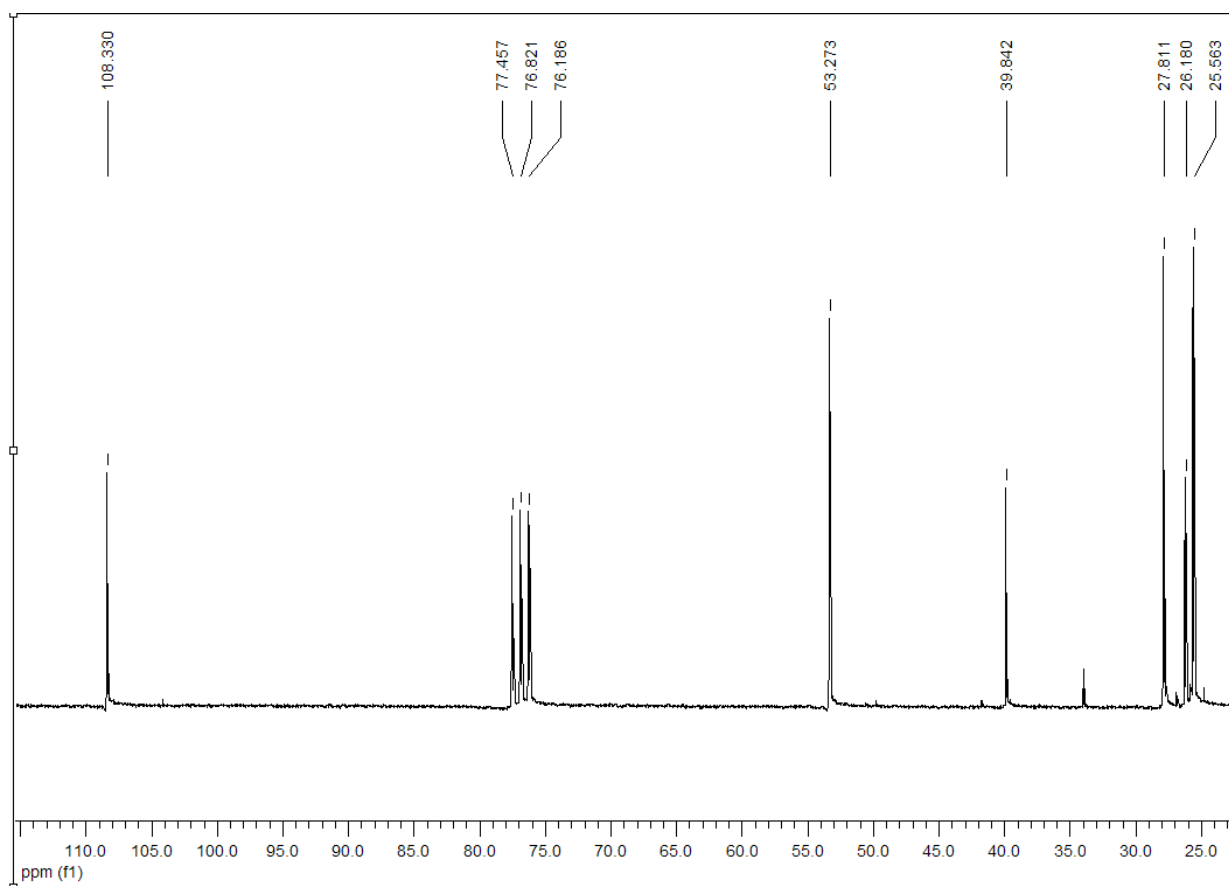

### 3-Methoxy-1-phenyloctan-1-one (14a).

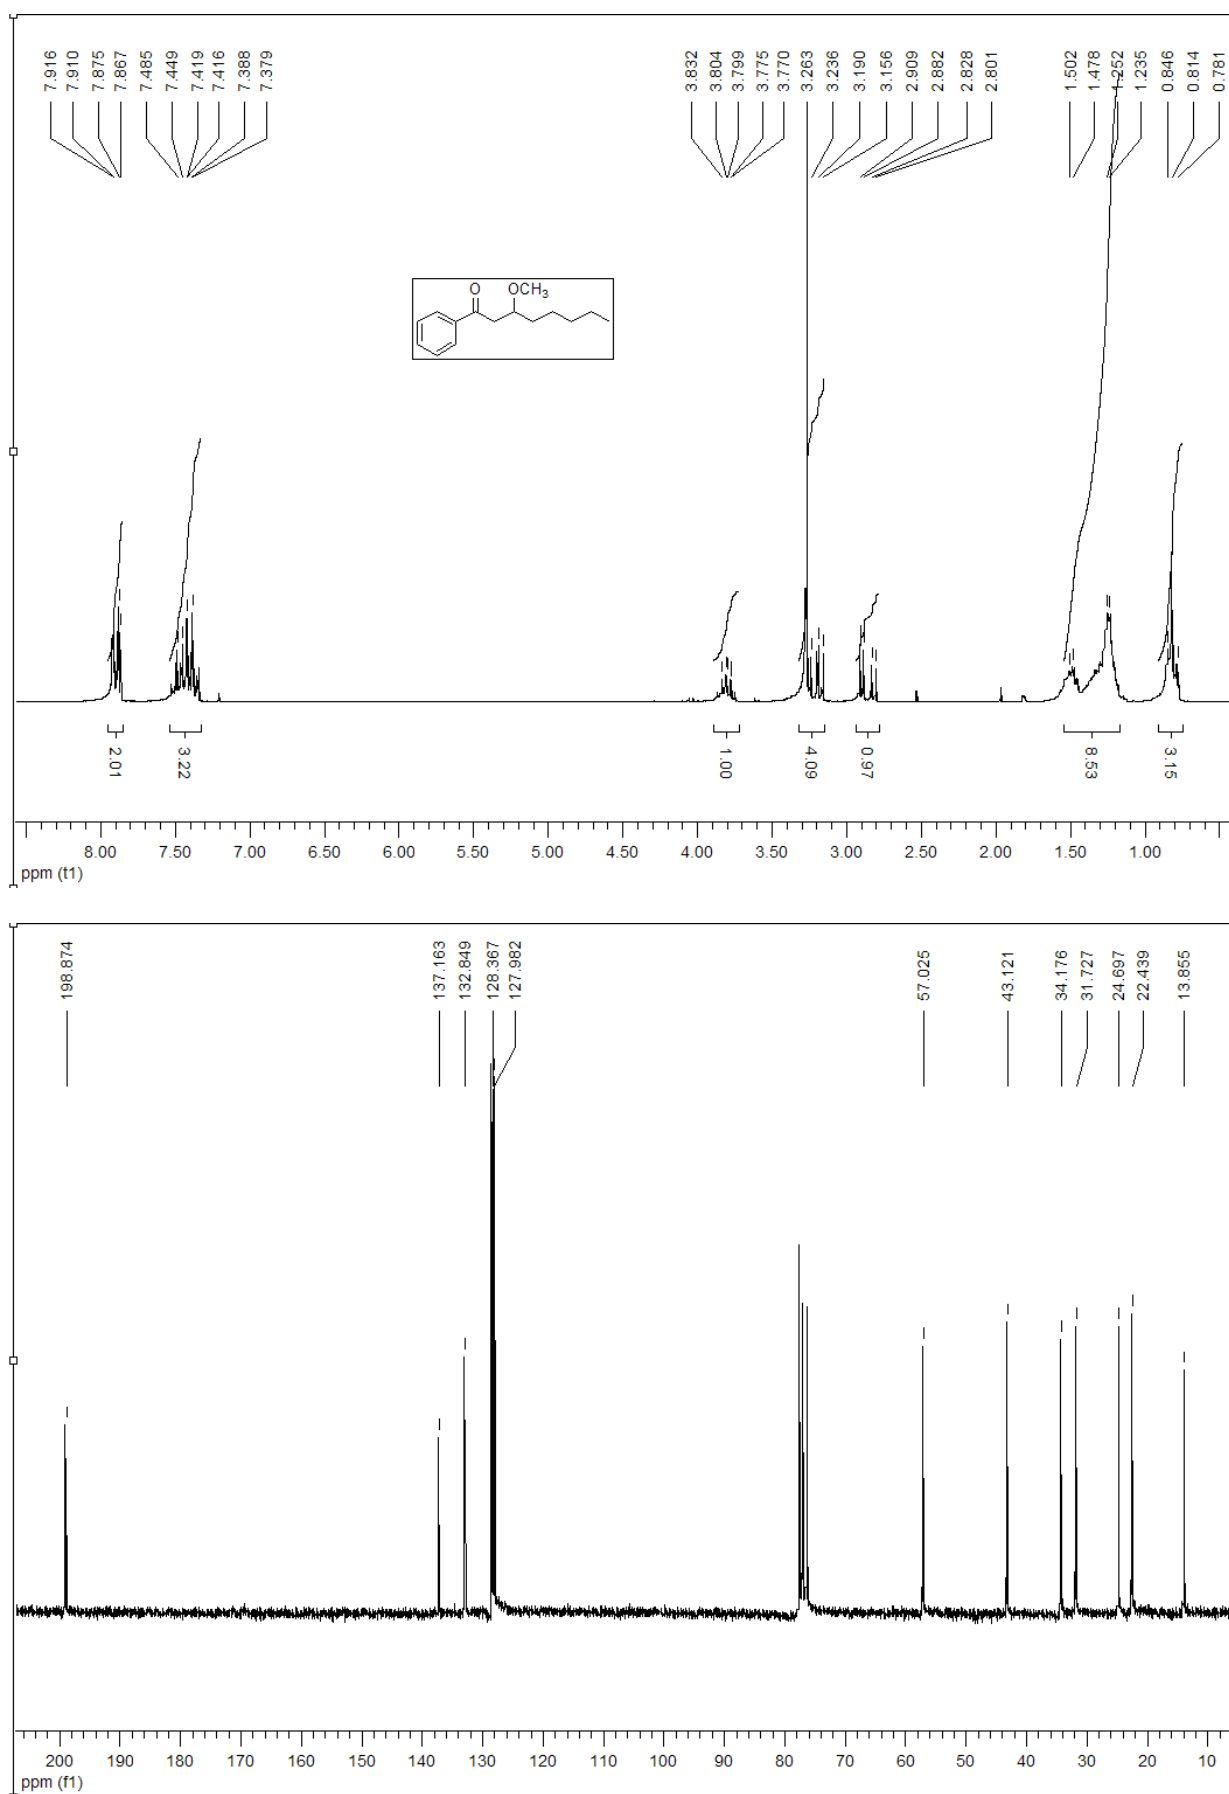



### 3-Cyclohexyl-3-methoxy-1-phenylpropan-1-one (14b).

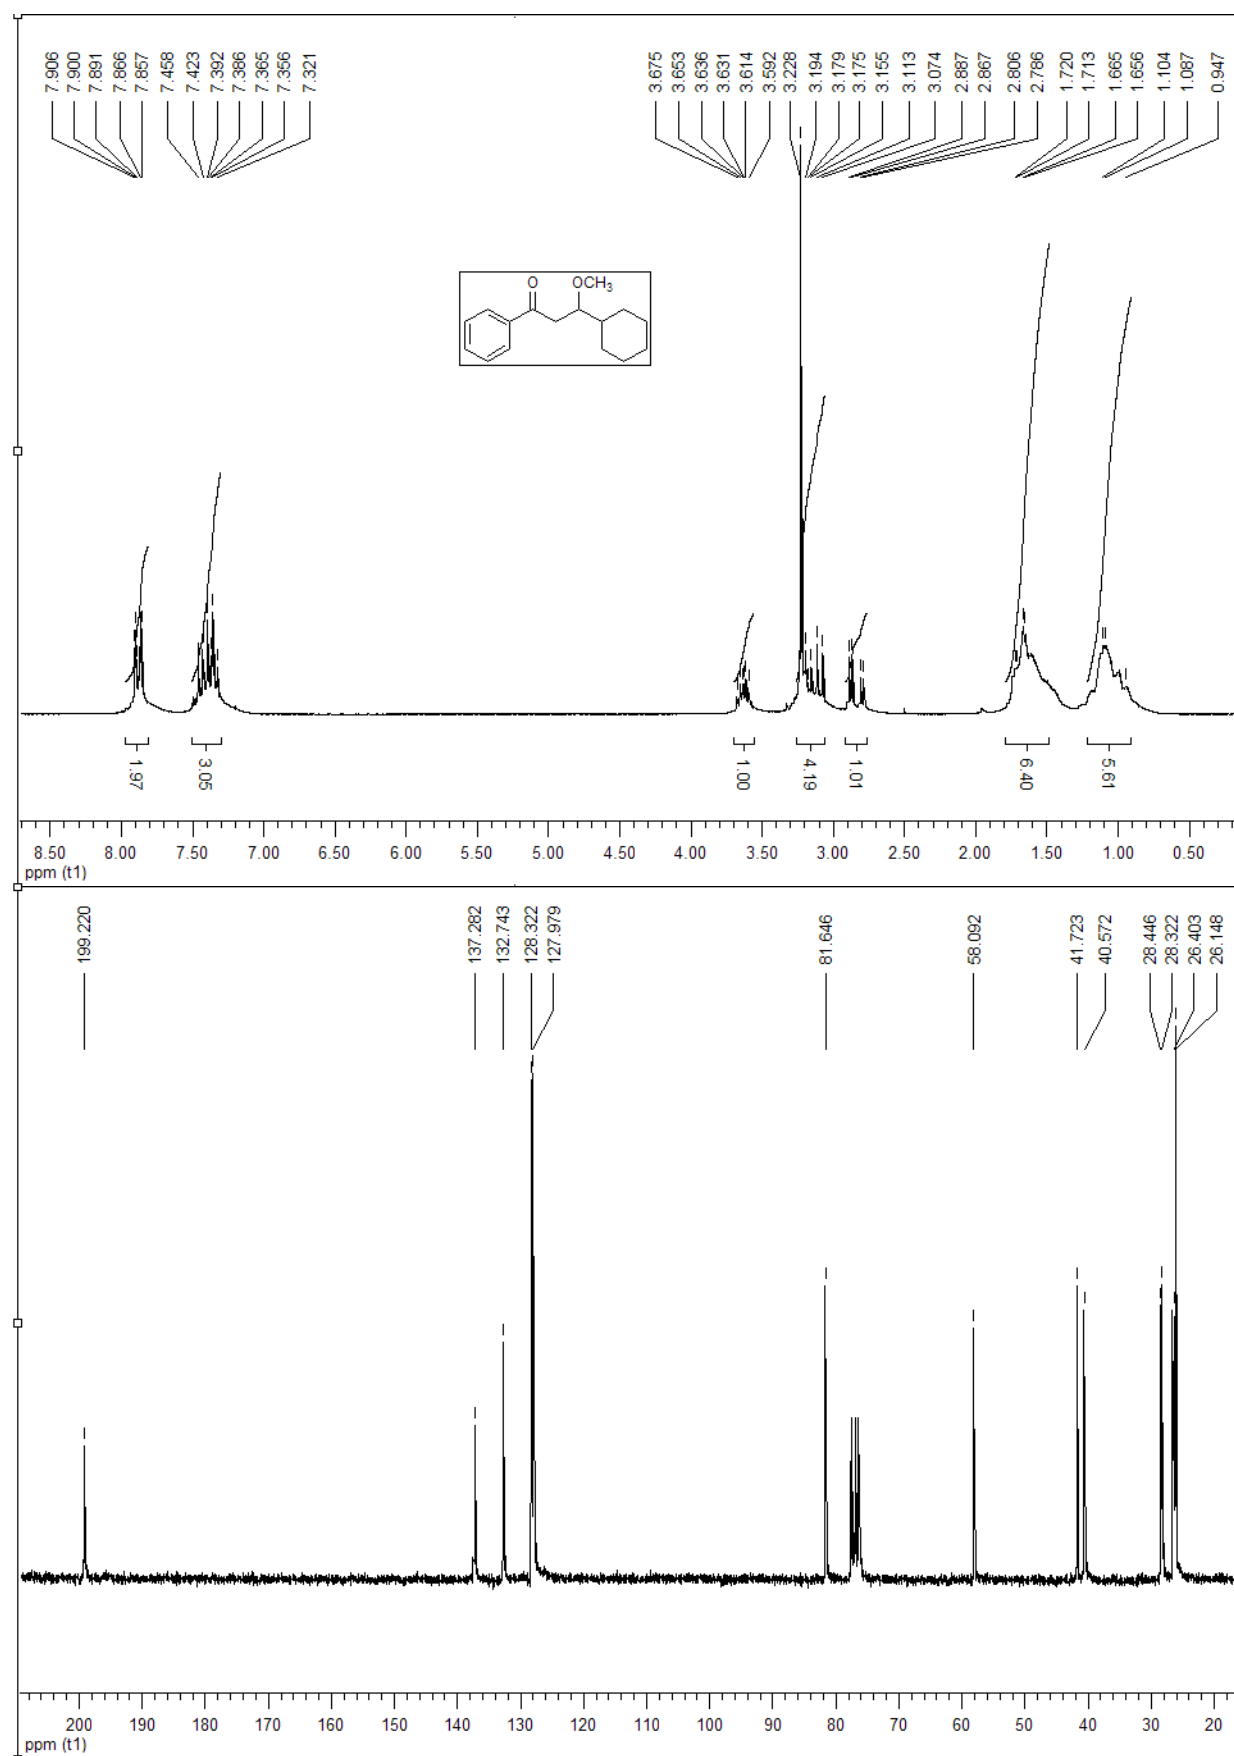

Supplement: c0ob00837k.pdf [file c0ob00837k.pdf]
